# Supplementary material for: Experimental Bothrops atrox Envenomation: Blood Plasma Proteome Effects after Local Tissue Damage and Perspectives on Thromboinflammation
Source: MDPI journal article supplement (doi:10.3390/toxins14090613), 2022-09-01
Supplement: s1 [file s1]

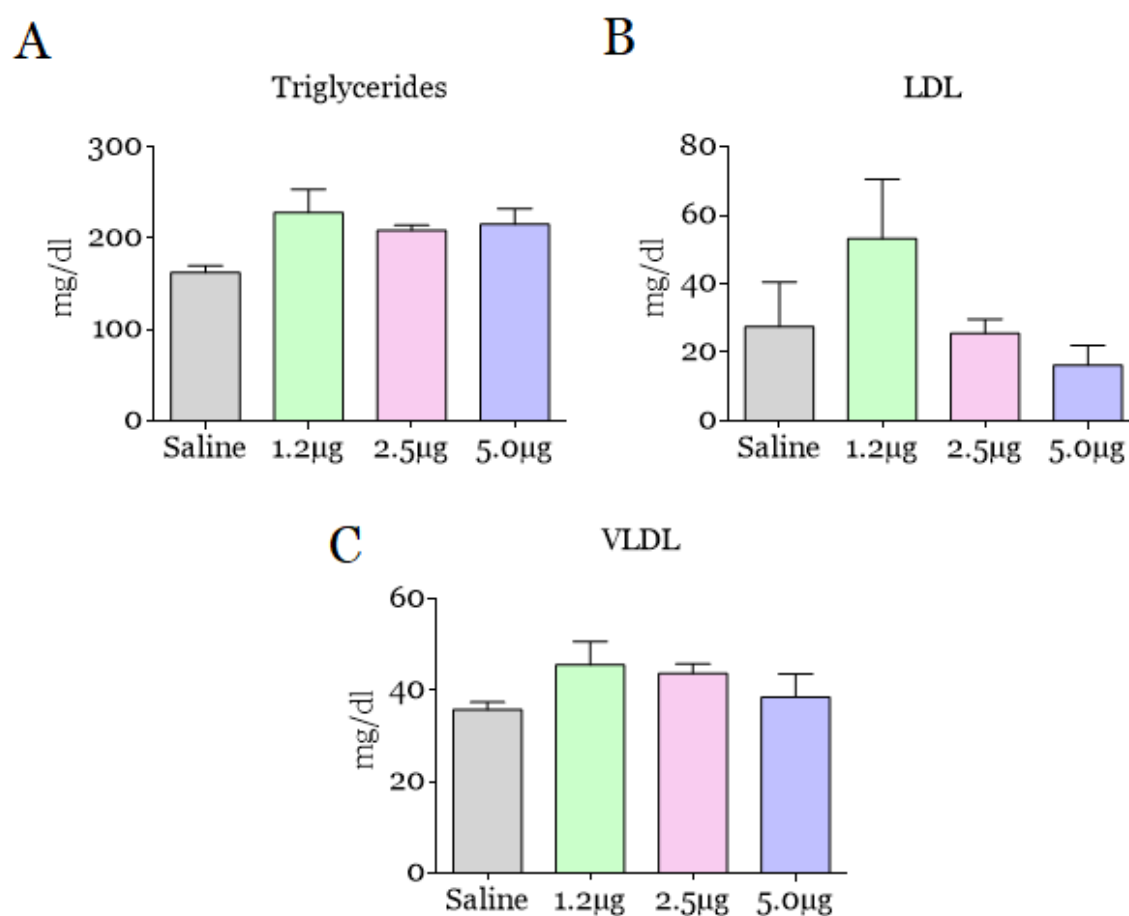

**Figure S2:** Triglycerides, low density lipoprotein cholesterol (LDL) and very low-density lipoprotein cholesterol (VLDL) levels were mensuared in the mice serum plasma. The columns represent the mean  $\pm$  SD (n = 6/group).
