# Supplementary material for: Experimental Bothrops atrox Envenomation: Blood Plasma Proteome Effects after Local Tissue Damage and Perspectives on Thromboinflammation
Source: Toxins (Basel). 2022 Sep 1;14(9):613. doi: 10.3390/toxins14090613 (PMC9503785; doi:10.3390/toxins14090613)
Supplement: Supplementary file 1 [file toxins-14-00613-s001.zip]

Archive with 5 entries (5 files):
- Supplementary Material Figure S1.pdf
- Supplementary Material Figure S2.pdf
- Supplementary Material Table S1.xlsx
- Supplementary Material Table S2.xlsx
- Supplementary Material Table S3.xlsx
