# Supplementary material for: Experimental Bothrops atrox Envenomation: Blood Plasma Proteome Effects after Local Tissue Damage and Perspectives on Thromboinflammation
Source: Toxins (Basel). 2022 Sep 1;14(9):613. doi: 10.3390/toxins14090613 (PMC9503785; doi:10.3390/toxins14090613)
Supplement: Supplementary file 1 [file toxins-14-00613-s001.zip › Supplementary Material Table S1.xlsx]

## Sheet: Title
Supplementary Material Table S1: Protein quantification based on protein intensity by the extracted ion chromatograms (XIC)
Experimental Bothrops atrox envenomation: blood plasma proteome effects after local tissue damage and perspectives on thromboinflammation
Joeliton S. Cavalcante1*, Ingrid Mayara C. de Brito1, Laudicéia Alves de Oliveira1, Luciana Curtolo de Barros2, Cayo Almeida3, Bruno Cesar Rossini4,5, Duaran Lopes Sousa6, Renata Sousa Alves6, Roberta Jeane Bezerra Jorge7,8, Lucilene Delazari dos Santos1,4,9*
1 Graduate Program in Tropical Diseases, Botucatu Medical School (FMB), São Paulo State University (UNESP), Botucatu, SP, Brazil.
2 Center for the Study of Venoms and Venomous Animals (CEVAP), São Paulo State University (UNESP), Botucatu, SP, Brazil.
3 Center of Mathematics, Computing Sciences and Cognition, Federal University of ABC, São Paulo, SP, Brazil.
4 Biotechnology Institute (IBTEC), São Paulo State University (UNESP), Botucatu, SP, Brazil.
5 Department of Chemical and Biological Sciences, São Paulo State University (UNESP), Botucatu, SP, Brazil.
6 Department of Clinical and Toxicological Analysis, Federal University of Ceará, Fortaleza, CE, Brazil.
7 Drug Research and Development Center, Federal University of Ceará (UFC), Fortaleza, CE, Brazil
8 Department of Physiology and Pharmacology, School of Medicine, Federal University of Ceará (UFC), Fortaleza, CE, Brazil.
9 Graduate Program in Research and Development (Medical Biotechnology), Botucatu Medical School (FMB), São Paulo State University (UNESP), Botucatu, SP, Brazil.
*Correspondence: lucilene.delazari@unesp.br (LDS); joeliton.calcavante@unesp.br (JSC)

## Sheet: Data
ProteinID	NoAA	Peptides	UniquePeptides	Coverage	Signal	NormalizedIonAbundanceFactor	Peptides	UniquePeptides	Coverage	Signal	NormalizedIonAbundanceFactor	Peptides	UniquePeptides	Coverage	Signal	NormalizedIonAbundanceFactor	Peptides	UniquePeptides	Coverage	Signal	NormalizedIonAbundanceFactor	Peptides	UniquePeptides	Coverage	Signal	NormalizedIonAbundanceFactor	Peptides	UniquePeptides	Coverage	Signal	NormalizedIonAbundanceFactor	Peptides	UniquePeptides	Coverage	Signal	NormalizedIonAbundanceFactor	Peptides	UniquePeptides	Coverage	Signal	NormalizedIonAbundanceFactor	Peptides	UniquePeptides	Coverage	Signal	NormalizedIonAbundanceFactor	Peptides	UniquePeptides	Coverage
		File Name: BasalI.sqt	File Name: BasalI.sqt	File Name: BasalI.sqt	File Name: BasalI.sqt	File Name: BasalI.sqt	File Name: BasalI_2.sqt	File Name: BasalI_2.sqt	File Name: BasalI_2.sqt	File Name: BasalI_2.sqt	File Name: BasalI_2.sqt	File Name: BasalII.sqt	File Name: BasalII.sqt	File Name: BasalII.sqt	File Name: BasalII.sqt	File Name: BasalII.sqt	File Name: BasalII_2.sqt	File Name: BasalII_2.sqt	File Name: BasalII_2.sqt	File Name: BasalII_2.sqt	File Name: BasalII_2.sqt	File Name: Atrox12I_2.sqt	File Name: Atrox12I_2.sqt	File Name: Atrox12I_2.sqt	File Name: Atrox12I_2.sqt	File Name: Atrox12I_2.sqt	File Name: Atrox12I.sqt	File Name: Atrox12I.sqt	File Name: Atrox12I.sqt	File Name: Atrox12I.sqt	File Name: Atrox12I.sqt	File Name: Atrox12II_2.sqt	File Name: Atrox12II_2.sqt	File Name: Atrox12II_2.sqt	File Name: Atrox12II_2.sqt	File Name: Atrox12II_2.sqt	File Name: Atrox12II.sqt	File Name: Atrox12II.sqt	File Name: Atrox12II.sqt	File Name: Atrox12II.sqt	File Name: Atrox12II.sqt	File Name: Atrox12III_2.sqt	File Name: Atrox12III_2.sqt	File Name: Atrox12III_2.sqt	File Name: Atrox12III_2.sqt	File Name: Atrox12III_2.sqt	File Name: Atrox12III.sqt	File Name: Atrox12III.sqt	File Name: Atrox12III.sqt
		Class Label: 1	Class Label: 1	Class Label: 1	Class Label: 1	Class Label: 1	Class Label: 2	Class Label: 2	Class Label: 2	Class Label: 2	Class Label: 2	Class Label: 3	Class Label: 3	Class Label: 3	Class Label: 3	Class Label: 3	Class Label: 4	Class Label: 4	Class Label: 4	Class Label: 4	Class Label: 4	Class Label: 5	Class Label: 5	Class Label: 5	Class Label: 5	Class Label: 5	Class Label: 6	Class Label: 6	Class Label: 6	Class Label: 6	Class Label: 6	Class Label: 7	Class Label: 7	Class Label: 7	Class Label: 7	Class Label: 7	Class Label: 8	Class Label: 8	Class Label: 8	Class Label: 8	Class Label: 8	Class Label: 9	Class Label: 9	Class Label: 9	Class Label: 9	Class Label: 9	Class Label: 10	Class Label: 10	Class Label: 10
		Dir: C:\Analise\Inflammation\Plasma_controle\Sample1\Basal_1	Dir: C:\Analise\Inflammation\Plasma_controle\Sample1\Basal_1	Dir: C:\Analise\Inflammation\Plasma_controle\Sample1\Basal_1	Dir: C:\Analise\Inflammation\Plasma_controle\Sample1\Basal_1	Dir: C:\Analise\Inflammation\Plasma_controle\Sample1\Basal_1	Dir: C:\Analise\Inflammation\Plasma_controle\Sample1\Basal_2	Dir: C:\Analise\Inflammation\Plasma_controle\Sample1\Basal_2	Dir: C:\Analise\Inflammation\Plasma_controle\Sample1\Basal_2	Dir: C:\Analise\Inflammation\Plasma_controle\Sample1\Basal_2	Dir: C:\Analise\Inflammation\Plasma_controle\Sample1\Basal_2	Dir: C:\Analise\Inflammation\Plasma_controle\Sample2\Basal_3	Dir: C:\Analise\Inflammation\Plasma_controle\Sample2\Basal_3	Dir: C:\Analise\Inflammation\Plasma_controle\Sample2\Basal_3	Dir: C:\Analise\Inflammation\Plasma_controle\Sample2\Basal_3	Dir: C:\Analise\Inflammation\Plasma_controle\Sample2\Basal_3	Dir: C:\Analise\Inflammation\Plasma_controle\Sample2\Basal_4	Dir: C:\Analise\Inflammation\Plasma_controle\Sample2\Basal_4	Dir: C:\Analise\Inflammation\Plasma_controle\Sample2\Basal_4	Dir: C:\Analise\Inflammation\Plasma_controle\Sample2\Basal_4	Dir: C:\Analise\Inflammation\Plasma_controle\Sample2\Basal_4	Dir: C:\Analise\Atrox\1.2\1.2a	Dir: C:\Analise\Atrox\1.2\1.2a	Dir: C:\Analise\Atrox\1.2\1.2a	Dir: C:\Analise\Atrox\1.2\1.2a	Dir: C:\Analise\Atrox\1.2\1.2a	Dir: C:\Analise\Atrox\1.2\1.2b	Dir: C:\Analise\Atrox\1.2\1.2b	Dir: C:\Analise\Atrox\1.2\1.2b	Dir: C:\Analise\Atrox\1.2\1.2b	Dir: C:\Analise\Atrox\1.2\1.2b	Dir: C:\Analise\Atrox\1.2\1.2c	Dir: C:\Analise\Atrox\1.2\1.2c	Dir: C:\Analise\Atrox\1.2\1.2c	Dir: C:\Analise\Atrox\1.2\1.2c	Dir: C:\Analise\Atrox\1.2\1.2c	Dir: C:\Analise\Atrox\1.2\1.2d	Dir: C:\Analise\Atrox\1.2\1.2d	Dir: C:\Analise\Atrox\1.2\1.2d	Dir: C:\Analise\Atrox\1.2\1.2d	Dir: C:\Analise\Atrox\1.2\1.2d	Dir: C:\Analise\Atrox\1.2\1.2e	Dir: C:\Analise\Atrox\1.2\1.2e	Dir: C:\Analise\Atrox\1.2\1.2e	Dir: C:\Analise\Atrox\1.2\1.2e	Dir: C:\Analise\Atrox\1.2\1.2e	Dir: C:\Analise\Atrox\1.2\1.2f	Dir: C:\Analise\Atrox\1.2\1.2f	Dir: C:\Analise\Atrox\1.2\1.2f
A6X935	942	14	14	0.189	70903184	0.00120112	14	14	0.189	5.73708e+07	0.00151515	15	15	0.189	7.16084e+07	0.00147059	12	12	0.189	6.6657e+07	0.0012967	27	27	0.189	1.48124e+08	0.00129375	32	32	0.189	1.6676e+08	0.00132642	33	33	0.189	1.60057e+08	0.000950943	29	29	0.189	1.69402e+08	0.00111423	28	28	0.189	1.46411e+08	0.00126803	29	29	0.189
B5X0G2	180	0	0	0	0	0	0	0	0	0	0	0	0	0	0	0	0	0	0	0	0	0	0	0	0	0	0	0	0	0	0	0	0	0	0	0	1	1	0.25	381559	1.31e-05	0	0	0	0	0	1	1	0.25
E9PV24	789	41	41	0.4081	6.91845e+08	0.0139928	43	43	0.4081	5.36787e+08	0.0169255	55	55	0.4081	7.37203e+08	0.0180755	48	48	0.4081	7.10506e+08	0.0165019	64	64	0.4081	1317171535	0.0137354	64	64	0.4081	1231496099	0.0116949	62	62	0.4081	1077384055	0.0076423	58	58	0.4081	1338685272	0.0105125	66	66	0.4081	1137515513	0.0117621	62	62	0.4081
E9Q414	4505	11	11	0.028	1.3074e+07	4.63e-05	9	9	0.028	8.80436e+06	4.86e-05	9	9	0.028	1.04319e+07	4.48e-05	8	8	0.028	1.10985e+07	4.51e-05	26	26	0.028	5.7369e+07	0.000104775	27	27	0.028	5.95934e+07	9.91e-05	23	23	0.028	3.39713e+07	4.22e-05	24	24	0.028	3.11562e+07	4.29e-05	33	33	0.028	5.00474e+07	9.06e-05	39	39	0.028
O08677	661	18	18	0.2663	4.26258e+08	0.0102906	19	19	0.2663	3.32996e+08	0.012533	17	17	0.2663	4.02264e+08	0.011773	16	16	0.2663	4.22826e+08	0.011722	33	33	0.2663	6.49919e+08	0.00808969	32	32	0.2663	5.85889e+08	0.00664133	32	32	0.2663	4.21589e+08	0.00356959	32	32	0.2663	4.13547e+08	0.00387641	30	30	0.2663	4.37541e+08	0.00540037	34	34	0.2663
O09049	174	0	0	0	0	0	0	0	0	0	0	0	0	0	0	0	0	0	0	0	0	0	0	0	0	0	0	0	0	0	0	0	0	0	0	0	0	0	0	0	0	0	0	0	0	0	0	0	0
O09164	251	1	1	0.0717	697839	4.44e-05	1	1	0.0717	405309	4.02e-05	1	1	0.0717	804379	6.2e-05	1	1	0.0717	794172	5.8e-05	0	0	0	0	0	1	1	0.0717	421949	1.26e-05	1	1	0.0717	123462	2.75e-06	0	0	0	0	0	0	0	0	0	0	0	0	0
O35664	513	0	0	0	0	0	0	0	0	0	0	0	0	0	0	0	0	0	0	0	0	3	3	0.0292	8.15965e+06	0.000130866	4	4	0.0292	3.62385e+06	5.29e-05	0	0	0	0	0	2	2	0.0292	1.44491e+06	1.75e-05	0	0	0	0	0	2	2	0.0292
O35930	734	0	0	0	0	0	0	0	0	0	0	0	0	0	0	0	0	0	0	0	0	1	1	0.0272	286033	3.21e-06	0	0	0	0	0	0	0	0	0	0	0	0	0	0	0	0	0	0	0	0	3	3	0.0272
O70165	334	1	1	0.0778	456319	2.18e-05	1	1	0.0778	372962	2.78e-05	1	1	0.0778	576299	3.34e-05	1	1	0.0778	515540	2.83e-05	4	4	0.0778	3.57813e+06	8.81e-05	4	4	0.0778	3.93579e+06	8.83e-05	4	4	0.0778	3.51553e+06	5.89e-05	3	3	0.0778	3.86874e+06	7.18e-05	3	3	0.0778	2.96389e+06	7.24e-05	6	6	0.0778
O70362	837	8	8	0.1207	4.52997e+07	0.000863657	7	7	0.1207	3.60497e+07	0.0010715	8	8	0.1207	4.61355e+07	0.00106632	8	8	0.1207	4.52155e+07	0.000989931	17	17	0.1207	1.09092e+08	0.00107236	20	20	0.1207	1.11736e+08	0.00100025	19	19	0.1207	8.05222e+07	0.000538419	17	17	0.1207	8.03753e+07	0.000594981	19	19	0.1207	7.16384e+07	0.000698274	24	24	0.1207
O88200	328	0	0	0	0	0	0	0	0	0	0	0	0	0	0	0	0	0	0	0	0	0	0	0	0	0	0	0	0	0	0	0	0	0	0	0	0	0	0	0	0	0	0	0	0	0	1	1	0.0335
O88700	1416	0	0	0	0	0	0	0	0	0	0	1	1	0.0212	872783	1.19e-05	0	0	0	0	0	0	0	0	0	0	0	0	0	0	0	0	0	0	0	0	0	0	0	0	0	0	0	0	0	0	0	0	0
O88783	2183	3	3	0.0165	2.7916e+06	2.04e-05	2	2	0.0165	2.25176e+06	2.57e-05	2	2	0.0165	2.76003e+06	2.45e-05	2	2	0.0165	2.85779e+06	2.4e-05	7	7	0.0165	8.70079e+06	3.28e-05	6	6	0.0165	4.35596e+06	1.5e-05	3	3	0.0165	1.20018e+06	3.08e-06	3	3	0.0165	1.15099e+06	3.27e-06	4	4	0.0165	2.39085e+06	8.94e-06	4	4	0.0165
O88947	481	7	7	0.1455	3.65048e+07	0.00121109	7	7	0.1455	2.96979e+07	0.00153602	7	7	0.1455	3.34074e+07	0.00134362	7	7	0.1455	3.15196e+07	0.00120082	13	13	0.1455	7.82914e+07	0.00133919	12	12	0.1455	6.46356e+07	0.00100686	13	13	0.1455	5.18363e+07	0.000603142	14	14	0.1455	5.23208e+07	0.000673962	11	11	0.1455	7.4403e+07	0.00126198	13	13	0.1455
O88968	430	0	0	0	0	0	0	0	0	0	0	0	0	0	0	0	0	0	0	0	0	0	0	0	0	0	0	0	0	0	0	0	0	0	0	0	0	0	0	0	0	2	2	0.1093	1.17794e+06	2.23e-05	2	2	0.1093
O89020	608	15	15	0.2336	7.82691e+07	0.00205427	16	16	0.2336	7.28752e+07	0.0029819	15	15	0.2336	7.09491e+07	0.00225747	16	16	0.2336	8.19642e+07	0.00247038	27	27	0.2336	1.53216e+08	0.00207336	25	25	0.2336	1.59065e+08	0.00196026	31	31	0.2336	1.30771e+08	0.00120376	28	28	0.2336	1.21625e+08	0.00123944	27	27	0.2336	1.25412e+08	0.00168283	26	26	0.2336
P00687	511	0	0	0	0	0	0	0	0	0	0	0	0	0	0	0	0	0	0	0	0	0	0	0	0	0	0	0	0	0	0	1	1	0.0196	240523	2.63e-06	1	1	0.0196	303069	3.67e-06	0	0	0	0	0	0	0	0
P00920	260	0	0	0	0	0	0	0	0	0	0	0	0	0	0	0	0	0	0	0	0	0	0	0	0	0	0	0	0	0	0	0	0	0	0	0	0	0	0	0	0	0	0	0	0	0	0	0	0
P01027	1663	93	93	0.4967	1031580229	0.00989879	87	87	0.4967	7.91411e+08	0.0118393	91	91	0.4967	7.16377e+08	0.00833352	80	80	0.4967	7.1649e+08	0.00789517	141	141	0.4967	2601276473	0.0128697	135	135	0.4967	2536709948	0.0114293	143	143	0.4967	2962266014	0.00996924	143	143	0.4967	2826009500	0.010529	138	138	0.4967	2501495299	0.0122719	139	139	0.4967
P01029	1738	3	3	0.0167	1.19341e+06	1.1e-05	1	1	0.0167	302260	4.33e-06	2	2	0.0167	980290	1.09e-05	1	1	0.0167	495248	5.22e-06	13	13	0.0167	1.05659e+07	5e-05	11	11	0.0167	7.20881e+06	3.11e-05	9	9	0.0167	6.73544e+06	2.17e-05	11	11	0.0167	8195325	2.92e-05	5	5	0.0167	4.09441e+06	1.92e-05	8	8	0.0167
P01592	159	2	2	0.1635	5.24387e+06	0.000526292	3	3	0.1635	5.73348e+06	0.000897093	3	3	0.1635	9.07445e+06	0.00110409	3	3	0.1635	8.75888e+06	0.00100947	2	2	0.1635	5.05994e+06	0.000261832	2	2	0.1635	5.53459e+06	0.000260813	3	3	0.1635	1.41794e+06	4.99e-05	3	3	0.1635	1.14641e+06	4.47e-05	2	2	0.1635	1.39814e+06	7.17e-05	1	1	0.1635
P01630	113	0	0	0	0	0	0	0	0	0	0	0	0	0	0	0	0	0	0	0	0	0	0	0	0	0	1	1	0.2124	33135.4	2.2e-06	0	0	0	0	0	0	0	0	0	0	0	0	0	0	0	0	0	0
P01631	113	0	0	0	0	0	0	0	0	0	0	0	0	0	0	0	0	0	0	0	0	2	2	0.2124	8325037	0.000606153	3	3	0.2124	1.10486e+07	0.000732604	4	4	0.2124	20715434	0.001026	2	2	0.2124	1.42051e+07	0.000778881	2	2	0.2124	1.44644e+07	0.0010443	0	0	0
P01633	149	0	0	0	0	0	0	0	0	0	0	0	0	0	0	0	0	0	0	0	0	0	0	0	0	0	0	0	0	0	0	0	0	0	0	0	0	0	0	0	0	0	0	0	0	0	2	2	0.1007
P01635	115	0	0	0	0	0	0	0	0	0	0	0	0	0	0	0	0	0	0	0	0	0	0	0	0	0	0	0	0	0	0	1	1	0.113	1.476e+06	7.18e-05	0	0	0	0	0	1	1	0.113	1.54351e+06	0.000109501	1	1	0.113
P01639	130	0	0	0	0	0	0	0	0	0	0	1	1	0.1077	482633	7.18e-05	1	1	0.1077	577074	8.13e-05	0	0	0	0	0	0	0	0	0	0	1	1	0.1077	1.57255e+06	6.77e-05	2	2	0.1077	1.83896e+06	8.76e-05	0	0	0	0	0	0	0	0
P01642	115	0	0	0	0	0	0	0	0	0	0	0	0	0	0	0	0	0	0	0	0	1	1	0.1043	704316	5.04e-05	1	1	0.1043	598527	3.9e-05	0	0	0	0	0	0	0	0	0	0	1	1	0.1043	366384	2.6e-05	0	0	0
P01674	108	0	0	0	0	0	0	0	0	0	0	0	0	0	0	0	0	0	0	0	0	0	0	0	0	0	0	0	0	0	0	1	1	0.1111	1.14124e+06	5.91e-05	1	1	0.1111	988094	5.67e-05	1	1	0.1111	1.5556e+06	0.000117511	1	1	0.1111
P01680	129	0	0	0	0	0	0	0	0	0	0	0	0	0	0	0	0	0	0	0	0	1	1	0.0853	1.74842e+06	0.000111514	1	1	0.0853	1925435	0.000111836	1	1	0.0853	1.3686e+06	5.94e-05	0	0	0	0	0	1	1	0.0853	1.14537e+06	7.24e-05	1	1	0.0853
P01728	117	0	0	0	0	0	0	0	0	0	0	0	0	0	0	0	0	0	0	0	0	1	1	0.359	1.14217e+06	8.03e-05	1	1	0.359	1.25096e+06	8.01e-05	1	1	0.359	552402	2.64e-05	1	1	0.359	354075	1.88e-05	1	1	0.359	1.39035e+06	9.69e-05	1	1	0.359
P01741	114	0	0	0	0	0	0	0	0	0	0	0	0	0	0	0	0	0	0	0	0	0	0	0	0	0	0	0	0	0	0	0	0	0	0	0	0	0	0	0	0	0	0	0	0	0	0	0	0
P01801	115	0	0	0	0	0	0	0	0	0	0	0	0	0	0	0	0	0	0	0	0	2	2	0.5913	2.34466e+06	0.000167747	2	2	0.5913	2.33721e+06	0.00015228	0	0	0	0	0	0	0	0	0	0	0	0	0	0	0	0	0	0
P01804	111	0	0	0	0	0	0	0	0	0	0	0	0	0	0	0	0	0	0	0	0	1	1	0.4054	2488114	0.000184426	1	1	0.4054	166192	1.12e-05	0	0	0	0	0	0	0	0	0	0	0	0	0	0	0	0	0	0
P01837	107	1	1	0.3178	1.72993e+07	0.00257998	0	0	0	0	0	1	1	0.3178	3.00444e+07	0.00543199	0	0	0	0	0	1	1	0.3178	2.46183e+06	0.000189299	0	0	0	0	0	0	0	0	0	0	1	1	0.3178	956378	5.54e-05	1	1	0.3178	5.69248e+06	0.000434034	0	0	0
P01843	105	0	0	0	0	0	0	0	0	0	0	0	0	0	0	0	0	0	0	0	0	0	0	0	0	0	0	0	0	0	0	0	0	0	0	0	0	0	0	0	0	0	0	0	0	0	0	0	0
P01844	104	0	0	0	0	0	0	0	0	0	0	0	0	0	0	0	0	0	0	0	0	3	3	0.25	2.606e+06	0.000206165	3	3	0.25	1.01291e+07	0.000729754	0	0	0	0	0	0	0	0	0	0	2	2	0.25	1.18583e+06	9.3e-05	2	2	0.25
P01867	404	0	0	0	0	0	0	0	0	0	0	0	0	0	0	0	0	0	0	0	0	4	4	0.1757	6.90895e+06	0.000140704	6	6	0.1757	7.89604e+06	0.000146443	8	8	0.1757	14929981	0.000206828	7	7	0.1757	5.14991e+06	7.9e-05	5	5	0.1757	5.68503e+06	0.000114804	6	6	0.1757
P01872	454	10	10	0.2181	4.35913e+07	0.0015322	11	11	0.2181	36653934	0.00200854	12	12	0.2181	6.99373e+07	0.00298011	15	15	0.2181	5.88002e+07	0.00237338	19	19	0.2181	180250063	0.00326658	21	21	0.2181	1.69898e+08	0.00280397	22	22	0.2181	2.43191e+08	0.00299793	18	18	0.2181	2.4616e+08	0.00335945	20	20	0.2181	1.36787e+08	0.00245807	18	18	0.2181
P01878	344	0	0	0	0	0	0	0	0	0	0	0	0	0	0	0	0	0	0	0	0	0	0	0	0	0	0	0	0	0	0	1	1	0.0436	321906	5.24e-06	1	1	0.0436	674434	1.21e-05	0	0	0	0	0	1	1	0.0436
P01887	119	2	2	0.1008	1.65265e+07	0.00221619	2	2	0.1008	1.30783e+07	0.00273413	2	2	0.1008	1.6364e+07	0.00266025	2	2	0.1008	1.515e+07	0.00233297	3	3	0.1008	3.85772e+07	0.00266722	6	6	0.1008	5.51944e+07	0.00347528	6	6	0.1008	5.85298e+07	0.00275271	6	6	0.1008	6.08468e+07	0.00316809	2	2	0.1008	2.85895e+07	0.00196004	4	4	0.1008
P01898	325	2	2	0.08	1.91007e+07	0.000937861	1	1	0.08	15553524	0.00119059	1	1	0.08	2.28798e+07	0.00136191	1	1	0.08	2.19862e+07	0.00123968	8	8	0.08	4.59156e+07	0.00116239	6	6	0.08	37424465	0.000862806	10	10	0.08	8.34793e+07	0.00143756	13	13	0.08	8.79526e+07	0.00167676	7	7	0.08	30718245	0.000771114	8	8	0.08
P01902	368	0	0	0	0	0	0	0	0	0	0	0	0	0	0	0	0	0	0	0	0	0	0	0	0	0	0	0	0	0	0	0	0	0	0	0	0	0	0	0	0	0	0	0	0	0	0	0	0
P01942	142	3	3	0.2817	9.89637e+06	0.00111214	4	4	0.2817	1.16048e+07	0.00203313	3	3	0.2817	8.02297e+06	0.00109301	4	4	0.2817	1.05633e+07	0.00136319	9	9	0.2817	6.70361e+08	0.0388414	9	9	0.2817	6.18546e+08	0.0326381	13	13	0.2817	7.36533e+08	0.0290291	13	13	0.2817	8.3555e+08	0.0364578	7	7	0.2817	1.67504e+08	0.00962372	6	6	0.2817
P02088	147	6	6	0.4626	1.05399e+07	0.00114417	6	6	0.4626	9.43085e+06	0.00159606	4	4	0.4626	5441689	0.000716136	4	4	0.4626	4735944	0.000590382	7	7	0.4626	3.20618e+08	0.0179451	6	6	0.4626	303969263	0.0154936	13	13	0.4626	5.28216e+08	0.0201106	14	14	0.4626	5.30261e+08	0.02235	4	4	0.4626	1.26494e+08	0.00702032	3	3	0.4626
P02089	147	3	3	0.2721	1.16247e+07	0.00126193	2	2	0.2721	5898778	0.0009983	2	2	0.2721	3.60069e+06	0.000473858	2	2	0.2721	3.51768e+06	0.000438513	4	4	0.2721	1.54609e+08	0.00865351	4	4	0.2721	8.6312e+07	0.00439941	4	4	0.2721	2.21017e+08	0.00841471	4	4	0.2721	247437629	0.0104293	3	3	0.2721	3.0332e+07	0.00168341	3	3	0.2721
P03953	259	4	4	0.2587	2.56642e+07	0.00158125	4	4	0.2587	2.42566e+07	0.00232995	4	4	0.2587	2.57839e+07	0.00192588	4	4	0.2587	29144677	0.00206207	5	5	0.2587	2.45911e+07	0.000781183	6	6	0.2587	2.10259e+07	0.00060827	7	7	0.2587	36618723	0.000791287	6	6	0.2587	1.59207e+07	0.000380863	7	7	0.2587	1.94395e+07	0.000612338	7	7	0.2587
P03987	398	8	8	0.4171	66577917	0.00266943	7	7	0.4171	5.2928e+07	0.00330841	9	9	0.4171	66155040	0.00321558	9	9	0.4171	6.21097e+07	0.0028597	19	19	0.4171	3.88986e+08	0.00804128	21	21	0.4171	474512356	0.00893316	17	17	0.4171	2.20517e+08	0.00310091	16	16	0.4171	2.09154e+08	0.00325604	17	17	0.4171	1.90884e+08	0.00391284	16	16	0.4171
P04186	761	22	22	0.3141	1.51937e+08	0.00318604	22	22	0.3141	129475136	0.00423271	21	21	0.3141	1.05477e+08	0.00268135	19	19	0.3141	1.14197e+08	0.00274987	29	29	0.3141	2.05428e+08	0.00222101	32	32	0.3141	2.22649e+08	0.00219218	34	34	0.3141	2.28752e+08	0.00168232	34	34	0.3141	2.11415e+08	0.00172131	38	38	0.3141	1.79151e+08	0.00192062	37	37	0.3141
P04247	154	0	0	0	0	0	0	0	0	0	0	0	0	0	0	0	0	0	0	0	0	0	0	0	0	0	0	0	0	0	0	0	0	0	0	0	0	0	0	0	0	0	0	0	0	0	0	0	0
P04939	184	1	1	0.1087	501243	4.35e-05	0	0	0	0	0	1	1	0.1087	998308	0.000104961	1	1	0.1087	1.08611e+06	0.000108169	0	0	0	0	0	0	0	0	0	0	0	0	0	0	0	0	0	0	0	0	0	0	0	0	0	0	0	0
P04945	108	0	0	0	0	0	0	0	0	0	0	0	0	0	0	0	0	0	0	0	0	0	0	0	0	0	0	0	0	0	0	0	0	0	0	0	0	0	0	0	0	0	0	0	0	0	0	0	0
P05017	153	0	0	0	0	0	1	1	0.0915	1.1327e+06	0.00018418	1	1	0.0915	1.57689e+06	0.000199383	1	1	0.0915	1.45249e+06	0.000173966	2	2	0.0915	564157	3.03e-05	1	1	0.0915	585113	2.87e-05	1	1	0.0915	555348	2.03e-05	0	0	0	0	0	0	0	0	0	0	1	1	0.0915
P05064	364	0	0	0	0	0	0	0	0	0	0	0	0	0	0	0	0	0	0	0	0	0	0	0	0	0	0	0	0	0	0	0	0	0	0	0	0	0	0	0	0	0	0	0	0	0	0	0	0
P05214	450	0	0	0	0	0	0	0	0	0	0	0	0	0	0	0	0	0	0	0	0	0	0	0	0	0	0	0	0	0	0	0	0	0	0	0	1	1	0.0333	902921	1.24e-05	0	0	0	0	0	0	0	0
P06151	332	0	0	0	0	0	0	0	0	0	0	0	0	0	0	0	0	0	0	0	0	0	0	0	0	0	0	0	0	0	0	0	0	0	0	0	0	0	0	0	0	0	0	0	0	0	0	0	0
P06330	118	0	0	0	0	0	0	0	0	0	0	0	0	0	0	0	0	0	0	0	0	0	0	0	0	0	0	0	0	0	0	0	0	0	0	0	0	0	0	0	0	0	0	0	0	0	0	0	0
P06683	548	10	10	0.2427	1.9124e+07	0.000556891	9	9	0.2427	2.28706e+07	0.00103828	11	11	0.2427	2.07173e+07	0.000731361	10	10	0.2427	2.36564e+07	0.000791064	17	17	0.2427	5.57485e+07	0.000837003	19	19	0.2427	7.52684e+07	0.00102914	27	27	0.2427	1.52476e+08	0.00155722	24	24	0.2427	161802844	0.00182941	20	20	0.2427	9.08219e+07	0.00135212	19	19	0.2427
P06728	395	5	5	0.2076	1.4325e+07	0.00057872	6	6	0.2076	3.30949e+07	0.0020844	4	4	0.2076	1.00928e+07	0.000494303	4	4	0.2076	2.46098e+07	0.00114171	15	15	0.2076	7.38217e+07	0.00153766	16	16	0.2076	7.72777e+07	0.00146588	23	23	0.2076	2.52376e+08	0.00357586	23	23	0.2076	3.26848e+08	0.00512691	24	24	0.2076	1.83269e+08	0.00378527	19	19	0.2076
P06909	1234	58	58	0.5227	2.85007e+08	0.00368563	57	57	0.5227	2.35246e+08	0.00474267	58	58	0.5227	2.83488e+08	0.00444426	54	54	0.5227	255871908	0.00379971	59	59	0.5227	3.65291e+08	0.00243555	58	58	0.5227	3.3732e+08	0.00204818	53	53	0.5227	2.66619e+08	0.00120922	55	55	0.5227	3.06245e+08	0.00153766	55	55	0.5227	3.58436e+08	0.00236974	52	52	0.5227
P07309	147	5	5	0.5102	1.02975e+07	0.00111785	5	5	0.5102	8.74033e+06	0.0014792	1	1	0.5102	1.46136e+06	0.000192318	1	1	0.5102	1.26789e+06	0.000158055	4	4	0.5102	5.02984e+06	0.000281522	3	3	0.5102	8.54776e+06	0.000435688	5	5	0.5102	1.21479e+07	0.000462504	3	3	0.5102	1.04685e+07	0.000441239	2	2	0.5102	3.919e+06	0.000217502	3	3	0.5102
P07310	381	0	0	0	0	0	0	0	0	0	0	0	0	0	0	0	0	0	0	0	0	0	0	0	0	0	0	0	0	0	0	0	0	0	0	0	0	0	0	0	0	0	0	0	0	0	0	0	0
P07724	608	168	168	0.898	24852566292	0.652288	171	171	0.898	13630079319	0.557714	199	199	0.898	17839783898	0.56763	189	189	0.898	20440256375	0.616065	237	237	0.898	37709750734	0.510299	229	229	0.898	41684459302	0.513702	263	263	0.898	59937302050	0.551727	263	263	0.898	45249408229	0.461122	241	241	0.898	41467374784	0.556427	245	245	0.898
P07758	413	1	1	0.3656	1.48693e+06	5.75e-05	1	1	0.3656	884747	5.33e-05	0	0	0	0	0	0	0	0	0	0	3	3	0.3656	1.22836e+07	0.00024471	4	4	0.3656	1.25535e+07	0.000227748	8	8	0.3656	5.28447e+07	0.000716114	7	7	0.3656	2.42483e+07	0.000363778	3	3	0.3656	3.62925e+07	0.000716923	3	3	0.3656
P07759	418	15	15	0.5144	2.45387e+08	0.00936801	13	13	0.5144	2.17669e+08	0.012955	21	21	0.5144	3.38092e+08	0.0156473	18	18	0.5144	388073861	0.017013	28	28	0.5144	2427064862	0.0477727	31	31	0.5144	1446858594	0.0259353	35	35	0.5144	1791115588	0.0239816	36	36	0.5144	2798672533	0.0414841	29	29	0.5144	1914759479	0.0373718	32	32	0.5144
P08121	1464	2	2	0.0102	1.56786e+06	1.71e-05	2	2	0.0102	1.31965e+06	2.24e-05	2	2	0.0102	2.10886e+06	2.79e-05	2	2	0.0102	1.94458e+06	2.43e-05	0	0	0	0	0	0	0	0	0	0	0	0	0	0	0	0	0	0	0	0	0	0	0	0	0	0	0	0
P08226	311	5	5	0.1222	30683158	0.00157439	6	6	0.1222	2.69659e+07	0.0021571	5	5	0.1222	2.74657e+07	0.00170848	5	5	0.1222	3.03509e+07	0.00178836	14	14	0.1222	1.91246e+08	0.00505948	14	14	0.1222	7.09177e+07	0.00170858	20	20	0.1222	3.96488e+08	0.00713509	16	16	0.1222	3.8025e+08	0.00757556	16	16	0.1222	7.51818e+07	0.00197223	17	17	0.1222
P08228	154	0	0	0	0	0	0	0	0	0	0	0	0	0	0	0	0	0	0	0	0	0	0	0	0	0	0	0	0	0	0	0	0	0	0	0	0	0	0	0	0	0	0	0	0	0	0	0	0
P08607	469	6	6	0.177	2.323e+07	0.0007904	6	6	0.177	1.91081e+07	0.00101359	7	7	0.177	2.43685e+07	0.00100516	5	5	0.177	2.35667e+07	0.000920808	10	10	0.177	4.78293e+07	0.000839065	9	9	0.177	3.82249e+07	0.000610681	12	12	0.177	6.79991e+07	0.000811448	13	13	0.177	5.99263e+07	0.000791681	13	13	0.177	4.71957e+07	0.000820984	14	14	0.177
P09411	417	0	0	0	0	0	0	0	0	0	0	0	0	0	0	0	0	0	0	0	0	0	0	0	0	0	0	0	0	0	0	0	0	0	0	0	0	0	0	0	0	0	0	0	0	0	0	0	0
P09581	977	2	2	0.0328	3.32101e+06	5.42e-05	2	2	0.0328	1.9069e+06	4.86e-05	2	2	0.0328	3.6396e+06	7.21e-05	2	2	0.0328	3.58193e+06	6.72e-05	4	4	0.0328	4.05242e+06	3.41e-05	4	4	0.0328	3.53096e+06	2.71e-05	2	2	0.0328	1.61227e+06	9.24e-06	1	1	0.0328	1.19152e+06	7.56e-06	3	3	0.0328	2.31869e+06	1.94e-05	3	3	0.0328
P09813	102	4	4	0.4706	3.50791e+06	0.000548807	4	4	0.4706	3.08068e+06	0.000751386	4	4	0.4706	6.87721e+06	0.00130434	5	5	0.4706	8.55371e+06	0.00153673	7	7	0.4706	8.26653e+07	0.00666803	8	8	0.4706	9.2459e+07	0.00679188	18	18	0.4706	363059602	0.0199209	20	20	0.4706	3.50366e+08	0.0212828	9	9	0.4706	2.08619e+08	0.0166863	12	12	0.4706
P10404	641	0	0	0	0	0	0	0	0	0	0	1	1	0.0234	365091	1.1e-05	1	1	0.0234	429076	1.23e-05	0	0	0	0	0	1	1	0.0234	139709	1.63e-06	1	1	0.0234	1.02714e+06	8.97e-06	1	1	0.0234	865782	8.37e-06	0	0	0	0	0	0	0	0
P10605	339	0	0	0	0	0	0	0	0	0	0	0	0	0	0	0	0	0	0	0	0	3	3	0.1091	599352	1.45e-05	2	2	0.1091	939671	2.08e-05	1	1	0.1091	619757	1.02e-05	1	1	0.1091	731037	1.34e-05	1	1	0.1091	526565	1.27e-05	2	2	0.1091
P10629	235	0	0	0	0	0	0	0	0	0	0	0	0	0	0	0	0	0	0	0	0	0	0	0	0	0	0	0	0	0	0	0	0	0	0	0	0	0	0	0	0	0	0	0	0	0	0	0	0
P10649	218	0	0	0	0	0	0	0	0	0	0	0	0	0	0	0	0	0	0	0	0	0	0	0	0	0	0	0	0	0	0	0	0	0	0	0	0	0	0	0	0	0	0	0	0	0	0	0	0
P11087	1453	2	2	0.02	3.11482e+06	3.42e-05	1	1	0.02	610761	1.05e-05	3	3	0.02	2.8403e+06	3.78e-05	1	1	0.02	777370	9.8e-06	3	3	0.02	4.48162e+06	2.54e-05	0	0	0	0	0	2	2	0.02	9.45279e+06	3.64e-05	3	3	0.02	10765089	4.59e-05	0	0	0	0	0	0	0	0
P11088	336	0	0	0	0	0	0	0	0	0	0	0	0	0	0	0	0	0	0	0	0	0	0	0	0	0	0	0	0	0	0	0	0	0	0	0	0	0	0	0	0	0	0	0	0	0	0	0	0
P11276	2477	43	43	0.2418	1.93135e+08	0.00124424	46	46	0.2418	1.53177e+08	0.00153845	45	45	0.2418	1.58981e+08	0.00124165	44	44	0.2418	145581906	0.00107702	81	81	0.2418	5.39717e+08	0.00179273	81	81	0.2418	4.53769e+08	0.00137262	95	95	0.2418	6.50039e+08	0.00146874	91	91	0.2418	5.59402e+08	0.00139928	78	78	0.2418	4.47982e+08	0.0014755	81	81	0.2418
P11352	201	0	0	0	0	0	0	0	0	0	0	0	0	0	0	0	0	0	0	0	0	0	0	0	0	0	0	0	0	0	0	0	0	0	0	0	0	0	0	0	0	0	0	0	0	0	0	0	0
P11404	133	0	0	0	0	0	0	0	0	0	0	0	0	0	0	0	0	0	0	0	0	0	0	0	0	0	0	0	0	0	0	0	0	0	0	0	0	0	0	0	0	0	0	0	0	0	0	0	0
P11588	180	0	0	0	0	0	0	0	0	0	0	0	0	0	0	0	0	0	0	0	0	0	0	0	0	0	0	0	0	0	0	1	1	0.25	5.54535e+06	0.00017242	1	1	0.25	5.43016e+06	0.000186916	1	1	0.25	7.30494e+06	0.000331093	0	0	0
P11589	180	0	0	0	0	0	0	0	0	0	0	0	0	0	0	0	0	0	0	0	0	0	0	0	0	0	0	0	0	0	0	1	1	0.1611	2.34171e+06	7.28e-05	1	1	0.1611	1.86654e+06	6.42e-05	1	1	0.1611	749830	3.4e-05	1	1	0.1611
P11680	464	7	7	0.222	9.1447e+06	0.000314502	6	6	0.222	7.55601e+06	0.000405127	7	7	0.222	1.09212e+07	0.000455337	9	9	0.222	1.41178e+07	0.00055756	6	6	0.222	2.30628e+07	0.000408949	6	6	0.222	2.21995e+07	0.000358482	8	8	0.222	1.38718e+07	0.000167319	8	8	0.222	1.31744e+07	0.000175922	7	7	0.222	1.53128e+07	0.000269242	7	7	0.222
P11859	477	1	1	0.0566	1.30907e+06	4.38e-05	1	1	0.0566	1.26968e+06	6.62e-05	1	1	0.0566	1.17826e+06	4.78e-05	1	1	0.0566	1.21359e+06	4.66e-05	6	6	0.0566	1.05007e+07	0.000181123	5	5	0.0566	8.80666e+06	0.000138335	9	9	0.0566	1.40268e+07	0.000164578	9	9	0.0566	1.26061e+07	0.000163745	11	11	0.0566	2.56317e+07	0.000438393	10	10	0.0566
P12246	224	3	3	0.1384	6.31054e+06	0.000449562	2	2	0.1384	4.84725e+06	0.000538349	2	2	0.1384	1.92022e+06	0.000165837	2	2	0.1384	1888372	0.000154484	5	5	0.1384	9.31091e+06	0.000341994	5	5	0.1384	1.38489e+07	0.000463242	5	5	0.1384	2.03947e+07	0.000509564	5	5	0.1384	2.42131e+07	0.000669744	5	5	0.1384	2.56496e+07	0.000934195	4	4	0.1384
P12710	127	0	0	0	0	0	0	0	0	0	0	0	0	0	0	0	0	0	0	0	0	0	0	0	0	0	0	0	0	0	0	0	0	0	0	0	0	0	0	0	0	0	0	0	0	0	0	0	0
P13020	780	21	21	0.3474	1.62431e+08	0.00332311	22	22	0.3474	1.68741e+08	0.005382	28	28	0.3474	1.95884e+08	0.00485829	21	21	0.3474	1.59166e+08	0.00373939	30	30	0.3474	3.25134e+08	0.00342959	34	34	0.3474	3.25326e+08	0.00312511	37	37	0.3474	2.95563e+08	0.00212074	33	33	0.3474	2.60266e+08	0.00206742	33	33	0.3474	2.6621e+08	0.00278442	34	34	0.3474
P13634	261	0	0	0	0	0	0	0	0	0	0	0	0	0	0	0	0	0	0	0	0	0	0	0	0	0	0	0	0	0	0	0	0	0	0	0	2	2	0.1226	496605	1.18e-05	0	0	0	0	0	0	0	0
P14106	253	1	1	0.0474	1.82454e+06	0.000115081	1	1	0.0474	1.4743e+06	0.000144971	1	1	0.0474	1.8274e+06	0.000139731	1	1	0.0474	1.73705e+06	0.000125816	2	2	0.0474	9.04245e+06	0.000294063	2	2	0.0474	8.77167e+06	0.000259778	3	3	0.0474	1.25588e+07	0.000277817	3	3	0.0474	1.38705e+07	0.000339687	3	3	0.0474	6.02236e+06	0.000194201	1	1	0.0474
P14152	334	0	0	0	0	0	0	0	0	0	0	0	0	0	0	0	0	0	0	0	0	0	0	0	0	0	0	0	0	0	0	0	0	0	0	0	0	0	0	0	0	0	0	0	0	0	0	0	0
P14847	225	2	2	0.0844	15426108	0.00109407	2	2	0.0844	1.26051e+07	0.00139373	0	0	0	0	0	2	2	0.0844	9.71947e+06	0.000791596	3	3	0.0844	7.42641e+06	0.000271563	2	2	0.0844	7.16224e+06	0.00023851	2	2	0.0844	1.92608e+06	4.79e-05	3	3	0.0844	5.45001e+06	0.000150079	3	3	0.0844	4.20648e+06	0.000152525	4	4	0.0844
P15327	259	0	0	0	0	0	0	0	0	0	0	0	0	0	0	0	0	0	0	0	0	1	1	0.0734	247006	7.85e-06	0	0	0	0	0	0	0	0	0	0	0	0	0	0	0	0	0	0	0	0	0	0	0
P16015	260	0	0	0	0	0	0	0	0	0	0	0	0	0	0	0	0	0	0	0	0	0	0	0	0	0	0	0	0	0	0	0	0	0	0	0	0	0	0	0	0	0	0	0	0	0	0	0	0
P16294	471	0	0	0	0	0	0	0	0	0	0	0	0	0	0	0	0	0	0	0	0	1	1	0.0255	169186	2.96e-06	1	1	0.0255	563373	8.96e-06	0	0	0	0	0	1	1	0.0255	220936	2.91e-06	0	0	0	0	0	1	1	0.0255
P16301	438	3	3	0.0959	4.91781e+06	0.000179172	3	3	0.0959	4.16621e+06	0.000236637	2	2	0.0959	4.63797e+06	0.000204848	1	1	0.0959	3.5884e+06	0.000150131	6	6	0.0959	9.95905e+06	0.000187076	5	5	0.0959	6.98404e+06	0.000119474	8	8	0.0959	1.70903e+07	0.000218377	7	7	0.0959	1.5884e+07	0.000224695	6	6	0.0959	1.14991e+07	0.000214188	6	6	0.0959
P16858	333	0	0	0	0	0	0	0	0	0	0	0	0	0	0	0	0	0	0	0	0	0	0	0	0	0	0	0	0	0	0	0	0	0	0	0	0	0	0	0	0	0	0	0	0	0	0	0	0
P17182	434	0	0	0	0	0	0	0	0	0	0	0	0	0	0	0	0	0	0	0	0	0	0	0	0	0	0	0	0	0	0	0	0	0	0	0	0	0	0	0	0	0	0	0	0	0	0	0	0
P17742	164	0	0	0	0	0	0	0	0	0	0	0	0	0	0	0	0	0	0	0	0	0	0	0	0	0	0	0	0	0	0	0	0	0	0	0	0	0	0	0	0	0	0	0	0	0	0	0	0
P17751	249	0	0	0	0	0	0	0	0	0	0	0	0	0	0	0	0	0	0	0	0	0	0	0	0	0	0	0	0	0	0	0	0	0	0	0	0	0	0	0	0	0	0	0	0	0	0	0	0
P18529	117	0	0	0	0	0	0	0	0	0	0	0	0	0	0	0	0	0	0	0	0	0	0	0	0	0	0	0	0	0	0	0	0	0	0	0	0	0	0	0	0	0	0	0	0	0	0	0	0
P19157	210	0	0	0	0	0	0	0	0	0	0	0	0	0	0	0	0	0	0	0	0	0	0	0	0	0	0	0	0	0	0	0	0	0	0	0	0	0	0	0	0	0	0	0	0	0	0	0	0
P19221	618	15	15	0.2524	9.7547e+07	0.00251882	16	16	0.2524	8.70053e+07	0.00350246	18	18	0.2524	1.14082e+08	0.00357116	16	16	0.2524	1.09684e+08	0.00325235	31	31	0.2524	183157438	0.00243843	30	30	0.2524	1.82633e+08	0.00221428	31	31	0.2524	2.24426e+08	0.00203243	32	32	0.2524	2.20449e+08	0.00221017	28	28	0.2524	2.0161e+08	0.00266151	27	27	0.2524
P20918	812	41	41	0.4544	2.41799e+08	0.00475193	40	40	0.4544	1.94819e+08	0.00596887	50	50	0.4544	2.58993e+08	0.00617038	50	50	0.4544	2.5624e+08	0.00578276	61	61	0.4544	7.36998e+08	0.00746766	61	61	0.4544	5.89486e+08	0.00543949	60	60	0.4544	825635500	0.00569066	56	56	0.4544	7.68598e+08	0.00586475	57	57	0.4544	6.70646e+08	0.00673818	55	55	0.4544
P21180	760	2	2	0.0553	2.74296e+06	5.76e-05	2	2	0.0553	2.12497e+06	6.96e-05	1	1	0.0553	664100	1.69e-05	2	2	0.0553	3.74059e+06	9.02e-05	3	3	0.0553	1.91177e+07	0.000206965	3	3	0.0553	1.95328e+07	0.000192572	2	2	0.0553	3.51828e+06	2.59e-05	3	3	0.0553	4.58458e+06	3.74e-05	4	4	0.0553	5.27235e+06	5.66e-05	2	2	0.0553
P21460	140	0	0	0	0	0	0	0	0	0	0	0	0	0	0	0	0	0	0	0	0	0	0	0	0	0	1	1	0.0786	375700	2.01e-05	0	0	0	0	0	0	0	0	0	0	0	0	0	0	0	0	0	0
P21550	434	0	0	0	0	0	0	0	0	0	0	0	0	0	0	0	0	0	0	0	0	0	0	0	0	0	0	0	0	0	0	0	0	0	0	0	0	0	0	0	0	0	0	0	0	0	0	0	0
P21614	476	19	19	0.3445	2.3933e+08	0.00802347	15	15	0.3445	2.59441e+08	0.0135596	19	19	0.3445	2.87842e+08	0.0116984	18	18	0.3445	2.40981e+08	0.00927725	39	39	0.3445	3.30815e+08	0.00571811	36	36	0.3445	3.56344e+08	0.00560923	41	41	0.3445	4.95419e+08	0.00582501	42	42	0.3445	5.8686e+08	0.00763896	36	36	0.3445	4.24536e+08	0.00727634	36	36	0.3445
P22599	413	5	5	0.3027	25977317	0.00100373	4	4	0.3027	1.986e+07	0.00119632	4	4	0.3027	1.49885e+07	0.000702082	4	4	0.3027	2.3836e+07	0.00105761	10	10	0.3027	1.75842e+08	0.00350305	11	11	0.3027	1.08042e+08	0.00196012	18	18	0.3027	295854643	0.00400921	20	20	0.3027	429075105	0.00643709	13	13	0.3027	1.69241e+08	0.0033432	14	14	0.3027
P23953	554	6	6	0.2094	2.44967e+07	0.000705617	6	6	0.2094	3.22425e+07	0.00144789	8	8	0.2094	2.86106e+07	0.000999072	6	6	0.2094	1.31979e+07	0.000436554	16	16	0.2094	110698414	0.00164402	18	18	0.2094	1.12398e+08	0.00152016	23	23	0.2094	3.00395e+08	0.00303468	24	24	0.2094	281257159	0.00314557	20	20	0.2094	194628196	0.00286617	20	20	0.2094
P24270	527	0	0	0	0	0	0	0	0	0	0	0	0	0	0	0	0	0	0	0	0	0	0	0	0	0	0	0	0	0	0	0	0	0	0	0	0	0	0	0	0	0	0	0	0	0	0	0	0
P24549	501	0	0	0	0	0	0	0	0	0	0	0	0	0	0	0	0	0	0	0	0	0	0	0	0	0	0	0	0	0	0	0	0	0	0	0	0	0	0	0	0	0	0	0	0	0	0	0	0
P26262	638	12	12	0.21	5.99333e+07	0.00149906	11	11	0.21	3.42237e+07	0.00133451	13	13	0.21	4.83229e+07	0.00146525	12	12	0.21	56810811	0.00163175	24	24	0.21	1.40749e+08	0.0018151	23	23	0.21	1.07903e+08	0.00126723	23	23	0.21	7.853e+07	0.000688883	26	26	0.21	1.03908e+08	0.0010091	23	23	0.21	81616402	0.00104367	24	24	0.21
P26928	716	0	0	0	0	0	1	1	0.0335	308520	1.07e-05	2	2	0.0335	1.21449e+06	3.28e-05	2	2	0.0335	1.11298e+06	2.85e-05	1	1	0.0335	405834	4.66e-06	1	1	0.0335	208309	2.18e-06	0	0	0	0	0	0	0	0	0	0	0	0	0	0	0	0	0	0
P27656	510	0	0	0	0	0	0	0	0	0	0	0	0	0	0	0	0	0	0	0	0	0	0	0	0	0	0	0	0	0	0	0	0	0	0	0	0	0	0	0	0	0	0	0	0	0	0	0	0
P28665	1476	23	23	0.3103	1.80338e+08	0.00194972	23	23	0.3103	4.03655e+08	0.00680363	34	34	0.3103	395684798	0.00518612	30	30	0.3103	3.39723e+08	0.00421777	61	61	0.3103	1173442147	0.00654108	61	61	0.3103	8.40562e+08	0.00426702	79	79	0.3103	1135434799	0.00430533	79	79	0.3103	1264758908	0.00530918	67	67	0.3103	1007283888	0.00556764	67	67	0.3103
P28666	1451	23	23	0.3639	122009725	0.00134183	20	20	0.3639	4.93184e+07	0.000845587	21	21	0.3639	93213539	0.00124277	20	20	0.3639	9.19086e+07	0.00116073	32	32	0.3639	1.92175e+08	0.00108969	31	31	0.3639	1.49336e+08	0.000771149	32	32	0.3639	1.14051e+08	0.00043991	33	33	0.3639	1.49042e+08	0.000636426	31	31	0.3639	1.34922e+08	0.000758613	34	34	0.3639
P28798	589	0	0	0	0	0	0	0	0	0	0	1	1	0.0221	1.14381e+06	3.76e-05	1	1	0.0221	1.091e+06	3.39e-05	1	1	0.0221	310679	4.34e-06	0	0	0	0	0	0	0	0	0	0	0	0	0	0	0	0	0	0	0	0	0	0	0
P29699	345	20	20	0.5362	2.26979e+08	0.0104987	19	19	0.5362	3.56574e+08	0.0257127	27	27	0.5362	5.47626e+08	0.0307075	24	24	0.5362	4.93637e+08	0.0262199	32	32	0.5362	4.98429e+08	0.0118866	30	30	0.5362	723487946	0.0157128	26	26	0.5362	754539920	0.0122403	30	30	0.5362	5.6398e+08	0.0101286	26	26	0.5362	5.68131e+08	0.0134349	30	30	0.5362
P29788	478	13	13	0.249	1.29364e+08	0.00431873	13	13	0.249	1.02871e+08	0.00535403	14	14	0.249	7.81602e+07	0.00316328	12	12	0.249	7.1552e+07	0.00274307	15	15	0.249	2.43423e+08	0.00418994	13	13	0.249	170779582	0.002677	14	14	0.249	1.97563e+08	0.00231317	14	14	0.249	1.46847e+08	0.00190346	12	12	0.249	1.60328e+08	0.00273645	12	12	0.249
P31532	130	0	0	0	0	0	0	0	0	0	0	0	0	0	0	0	0	0	0	0	0	4	4	0.4154	5.47593e+06	0.000346568	3	3	0.4154	4.05145e+06	0.000233511	7	7	0.4154	1.4105e+07	0.00060724	5	5	0.4154	9.09674e+06	0.000433559	3	3	0.4154	4.94939e+06	0.000310609	4	4	0.4154
P31725	113	0	0	0	0	0	0	0	0	0	0	0	0	0	0	0	0	0	0	0	0	0	0	0	0	0	0	0	0	0	0	2	2	0.1947	1.33412e+06	6.61e-05	2	2	0.1947	1.53178e+06	8.4e-05	1	1	0.1947	353657	2.55e-05	1	1	0.1947
P32261	465	14	14	0.3484	1.49204e+08	0.00512034	13	13	0.3484	7.40181e+07	0.00396006	15	15	0.3484	2.15173e+08	0.00895189	15	15	0.3484	1.28465e+08	0.00506262	23	23	0.3484	2.46766e+08	0.00436623	25	25	0.3484	2.73559e+08	0.00440797	26	26	0.3484	1.60345e+08	0.00192989	32	32	0.3484	1.7867e+08	0.0023807	26	26	0.3484	3.50076e+08	0.00614207	31	31	0.3484
P32848	110	0	0	0	0	0	0	0	0	0	0	0	0	0	0	0	0	0	0	0	0	0	0	0	0	0	0	0	0	0	0	0	0	0	0	0	0	0	0	0	0	0	0	0	0	0	0	0	0
P33587	460	2	2	0.0435	2.34871e+06	8.15e-05	2	2	0.0435	1.73413e+06	9.38e-05	2	2	0.0435	2668873	0.00011224	2	2	0.0435	2.52422e+06	0.000100557	3	3	0.0435	4.40154e+06	7.87e-05	3	3	0.0435	4.26384e+06	6.95e-05	3	3	0.0435	2.81948e+06	3.43e-05	3	3	0.0435	2.89693e+06	3.9e-05	3	3	0.0435	2.40163e+06	4.26e-05	3	3	0.0435
P33622	99	0	0	0	0	0	0	0	0	0	0	0	0	0	0	0	0	0	0	0	0	4	4	0.7172	1.36126e+07	0.00113131	4	4	0.7172	9.68797e+06	0.000733227	10	10	0.7172	6.22146e+07	0.00351712	10	10	0.7172	6.85159e+07	0.00428807	5	5	0.7172	2.03928e+07	0.00168053	5	5	0.7172
P34928	88	0	0	0	0	0	0	0	0	0	0	0	0	0	0	0	0	0	0	0	0	0	0	0	0	0	1	1	0.2614	622097	5.3e-05	8	8	0.2614	1.57882e+07	0.00100411	9	9	0.2614	2.46575e+07	0.00173609	4	4	0.2614	5.49073e+06	0.000509041	7	7	0.2614
P35441	1170	0	0	0	0	0	0	0	0	0	0	0	0	0	0	0	0	0	0	0	0	0	0	0	0	0	0	0	0	0	0	3	3	0.0274	2.19498e+06	1.05e-05	2	2	0.0274	1.67282e+06	8.86e-06	0	0	0	0	0	0	0	0
P35700	199	0	0	0	0	0	0	0	0	0	0	0	0	0	0	0	0	0	0	0	0	0	0	0	0	0	0	0	0	0	0	0	0	0	0	0	0	0	0	0	0	0	0	0	0	0	0	0	0
P35917	1363	0	0	0	0	0	0	0	0	0	0	0	0	0	0	0	0	0	0	0	0	1	1	0.0066	328835	1.98e-06	0	0	0	0	0	0	0	0	0	0	0	0	0	0	0	0	0	0	0	0	0	0	0
P39039	239	6	6	0.3138	1.42277e+07	0.000949968	3	3	0.3138	8.2019e+06	0.000853755	6	6	0.3138	1.48887e+07	0.00120514	5	5	0.3138	1.38493e+07	0.00106188	5	5	0.3138	2.76027e+07	0.000950227	6	6	0.3138	2.70934e+07	0.000849389	6	6	0.3138	2.32908e+07	0.000545403	5	5	0.3138	2.37601e+07	0.000615966	7	7	0.3138	3.0241e+07	0.0010323	6	6	0.3138
P41317	244	5	5	0.2131	7.57759e+06	0.000495579	4	4	0.2131	6.32153e+06	0.000644539	5	5	0.2131	9087881	0.00072053	6	6	0.2131	9676157	0.000726703	5	5	0.2131	2.8585e+07	0.000963881	4	4	0.2131	28234360	0.00086702	5	5	0.2131	4.20579e+07	0.00096469	6	6	0.2131	3.76801e+07	0.000956816	4	4	0.2131	3.29911e+07	0.00110309	3	3	0.2131
P42703	1092	7	7	0.076	2.51743e+07	0.00036788	7	7	0.076	2.15188e+07	0.000490244	5	5	0.076	1.81619e+07	0.00032175	5	5	0.076	1.78844e+07	0.00030012	18	18	0.076	4.57696e+07	0.000344849	17	17	0.076	44966706	0.000308538	26	26	0.076	110192986	0.000564757	22	22	0.076	7.81527e+07	0.000443432	17	17	0.076	5.40052e+07	0.000403477	20	20	0.076
P46412	226	0	0	0	0	0	0	0	0	0	0	0	0	0	0	0	0	0	0	0	0	6	6	0.2655	1.5392e+07	0.000560352	5	5	0.2655	1.66506e+07	0.00055203	5	5	0.2655	2.07118e+07	0.000512908	5	5	0.2655	2.40815e+07	0.000660208	5	5	0.2655	1.93457e+07	0.000698364	6	6	0.2655
P47791	500	1	1	0.072	91829.8	2.93e-06	0	0	0	0	0	1	1	0.072	198473	7.68e-06	0	0	0	0	0	0	0	0	0	0	0	0	0	0	0	0	0	0	0	0	0	0	0	0	0	0	0	0	0	0	0	0	0
P47878	292	2	2	0.0685	3.64193e+06	0.000199031	2	2	0.0685	2.75488e+06	0.000234713	1	1	0.0685	1.50907e+06	0.0001	2	2	0.0685	2.47632e+06	0.000155406	3	3	0.0685	4.38085e+06	0.000123438	3	3	0.0685	4.00873e+06	0.000102864	0	0	0	0	0	0	0	0	0	0	2	2	0.0685	1.79227e+06	5.01e-05	1	1	0.0685
P49182	478	0	0	0	0	0	0	0	0	0	0	0	0	0	0	0	0	0	0	0	0	5	5	0.1548	2.32292e+07	0.000399834	5	5	0.1548	22761093	0.000356785	6	6	0.1548	2.78194e+07	0.000325725	6	6	0.1548	2.14019e+07	0.000277415	6	6	0.1548	3.39596e+07	0.000579616	5	5	0.1548
P51880	132	0	0	0	0	0	0	0	0	0	0	0	0	0	0	0	0	0	0	0	0	0	0	0	0	0	1	1	0.2197	6.36692e+08	0.0361407	0	0	0	0	0	0	0	0	0	0	0	0	0	0	0	0	0	0
P51885	338	0	0	0	0	0	0	0	0	0	0	2	2	0.1006	2.14266e+07	0.00122635	2	2	0.1006	21030458	0.00114019	4	4	0.1006	7.06793e+06	0.000172048	4	4	0.1006	1.55674e+07	0.000345095	6	6	0.1006	8.77075e+06	0.000145228	6	6	0.1006	1.42656e+07	0.000261504	6	6	0.1006	1.49698e+07	0.000361329	7	7	0.1006
P51910	189	0	0	0	0	0	0	0	0	0	0	0	0	0	0	0	0	0	0	0	0	0	0	0	0	0	0	0	0	0	0	0	0	0	0	0	2	2	0.1005	1.03363e+06	3.39e-05	0	0	0	0	0	0	0	0
P52430	355	8	8	0.2366	4.52083e+07	0.00203218	6	6	0.2366	3.92444e+07	0.00275021	8	8	0.2366	38224264	0.002083	6	6	0.2366	2.89309e+07	0.0014934	12	12	0.2366	7.88489e+07	0.00182744	11	11	0.2366	7.74308e+07	0.00163428	11	11	0.2366	1.11734e+08	0.00176152	11	11	0.2366	1.10379e+08	0.00192648	13	13	0.2366	1.23471e+08	0.00283753	12	12	0.2366
P52480	531	1	1	0.0527	251210	7.55e-06	0	0	0	0	0	1	1	0.0527	331918	1.21e-05	1	1	0.0527	5.13225e+06	0.000177116	0	0	0	0	0	0	0	0	0	0	0	0	0	0	0	0	0	0	0	0	0	0	0	0	0	0	0	0
P54923	362	0	0	0	0	0	0	0	0	0	0	0	0	0	0	0	0	0	0	0	0	0	0	0	0	0	1	1	0.0994	10958.6	2.27e-07	0	0	0	0	0	0	0	0	0	0	0	0	0	0	0	0	0	0
P55065	493	0	0	0	0	0	0	0	0	0	0	0	0	0	0	0	0	0	0	0	0	2	2	0.0243	1.42913e+06	2.39e-05	2	2	0.0243	1.33435e+06	2.03e-05	2	2	0.0243	1.23624e+06	1.4e-05	1	1	0.0243	1.16281e+06	1.46e-05	3	3	0.0243	3.1222e+06	5.17e-05	3	3	0.0243
P62702	263	0	0	0	0	0	0	0	0	0	0	0	0	0	0	0	0	0	0	0	0	0	0	0	0	0	0	0	0	0	0	0	0	0	0	0	0	0	0	0	0	0	0	0	0	0	0	0	0
P62827	216	0	0	0	0	0	0	0	0	0	0	0	0	0	0	0	0	0	0	0	0	0	0	0	0	0	0	0	0	0	0	0	0	0	0	0	0	0	0	0	0	0	0	0	0	0	0	0	0
P63017	646	0	0	0	0	0	0	0	0	0	0	0	0	0	0	0	0	0	0	0	0	0	0	0	0	0	0	0	0	0	0	0	0	0	0	0	0	0	0	0	0	0	0	0	0	0	0	0	0
P70274	380	1	1	0.0447	504574	2.12e-05	2	2	0.0447	958865	6.28e-05	1	1	0.0447	834886	4.25e-05	2	2	0.0447	1.48048e+06	7.14e-05	5	5	0.0447	1.77157e+07	0.000383573	4	4	0.0447	1.65136e+07	0.000325612	7	7	0.0447	2.05892e+07	0.00030324	5	5	0.0447	1.73483e+07	0.000282866	4	4	0.0447	2.11441e+07	0.000453953	5	5	0.0447
P70296	187	0	0	0	0	0	0	0	0	0	0	0	0	0	0	0	0	0	0	0	0	0	0	0	0	0	0	0	0	0	0	0	0	0	0	0	0	0	0	0	0	0	0	0	0	0	0	0	0
P70375	446	0	0	0	0	0	0	0	0	0	0	0	0	0	0	0	0	0	0	0	0	0	0	0	0	0	1	1	0.0426	244857	4.11e-06	0	0	0	0	0	0	0	0	0	0	0	0	0	0	0	0	0	0
P70389	603	1	1	0.0166	1.10707e+06	2.93e-05	0	0	0	0	0	0	0	0	0	0	0	0	0	0	0	8	8	0.0166	7.67613e+06	0.000104737	8	8	0.0166	8.2994e+06	0.000103126	14	14	0.0166	18700641	0.000173568	14	14	0.0166	3.24952e+07	0.000333894	13	13	0.0166	2.05364e+07	0.000277852	14	14	0.0166
P84751	237	0	0	0	0	0	0	0	0	0	0	0	0	0	0	0	0	0	0	0	0	0	0	0	0	0	0	0	0	0	0	0	0	0	0	0	0	0	0	0	0	0	0	0	0	0	0	0	0
P97290	504	2	2	0.0655	7.54406e+06	0.000238862	3	3	0.0655	2.57082e+07	0.00126899	2	2	0.0655	2.37781e+07	0.000912695	0	0	0	0	0	6	6	0.0655	4.37299e+07	0.000713876	8	8	0.0655	5.58799e+07	0.000830741	15	15	0.0655	4.68248e+07	0.000519967	16	16	0.0655	8.28527e+07	0.00101855	9	9	0.0655	4.24273e+07	0.000686785	12	12	0.0655
P97298	417	0	0	0	0	0	0	0	0	0	0	1	1	0.0264	1.23525e+06	5.73e-05	0	0	0	0	0	5	5	0.0264	5807382	0.000114583	7	7	0.0264	5.28426e+06	9.49e-05	6	6	0.0264	1.34201e+07	0.000180115	5	5	0.0264	14325104	0.000212847	5	5	0.0264	11956203	0.000233918	5	5	0.0264
P98064	704	1	1	0.0156	856425	1.94e-05	0	0	0	0	0	2	2	0.0156	1.92866e+06	5.3e-05	1	1	0.0156	1.59015e+06	4.14e-05	8	8	0.0156	1.25339e+07	0.000146483	5	5	0.0156	8.69258e+06	9.25e-05	5	5	0.0156	1.08475e+07	8.62e-05	5	5	0.0156	1.0678e+07	9.4e-05	7	7	0.0156	1.18929e+07	0.000137822	5	5	0.0156
P98086	245	0	0	0	0	0	0	0	0	0	0	0	0	0	0	0	0	0	0	0	0	3	3	0.1429	6.40213e+06	0.000214997	3	3	0.1429	6.46359e+06	0.000197673	3	3	0.1429	7.88282e+06	0.000180072	4	4	0.1429	8.26374e+06	0.000208986	4	4	0.1429	4.19486e+06	0.000139687	4	4	0.1429
Q00623	264	8	8	0.2652	196316399	0.0118665	10	10	0.2652	2.98549e+07	0.00281338	14	14	0.2652	1.46927e+08	0.0107666	11	11	0.2652	1.10226e+08	0.00765108	39	39	0.2652	6.9555e+08	0.021677	38	38	0.2652	7.37686e+08	0.0209367	60	60	0.2652	2854313637	0.0605101	63	63	0.2652	2965471154	0.0695979	49	49	0.2652	1241078304	0.0383531	43	43	0.2652
Q00724	201	9	9	0.4677	1.7434e+07	0.00138412	7	7	0.4677	12189437	0.0015087	10	10	0.4677	1.79712e+07	0.00172966	8	8	0.4677	1.39116e+07	0.00126831	12	12	0.4677	5.11059e+07	0.00209194	11	11	0.4677	5.44406e+07	0.0020294	11	11	0.4677	4.50898e+07	0.00125549	10	10	0.4677	4.22272e+07	0.00130168	12	12	0.4677	3.97321e+07	0.00161269	10	10	0.4677
Q00896	412	0	0	0	0	0	0	0	0	0	0	0	0	0	0	0	0	0	0	0	0	2	2	0.2961	1.07863e+07	0.000215403	2	2	0.2961	1.6437e+07	0.000298928	2	2	0.2961	1.57432e+06	2.14e-05	3	3	0.2961	4.77381e+06	7.18e-05	1	1	0.2961	4.63929e+06	9.19e-05	2	2	0.2961
Q00897	413	4	4	0.3196	3.38059e+07	0.00130621	4	4	0.3196	2.96124e+07	0.00178378	1	1	0.3196	3.22693e+06	0.000151154	2	2	0.3196	3.44303e+06	0.000152769	10	10	0.3196	3.49988e+08	0.00697232	10	10	0.3196	2.07197e+08	0.00375902	11	11	0.3196	2.64677e+08	0.00358671	8	8	0.3196	1.27221e+08	0.0019086	8	8	0.3196	1.69722e+08	0.00335269	11	11	0.3196
Q00898	413	8	8	0.3366	1.15663e+08	0.00446905	8	8	0.3366	7.34604e+07	0.00442506	1	1	0.3366	1.64299e+06	7.7e-05	1	1	0.3366	1.55411e+06	6.9e-05	14	14	0.3366	8.13074e+08	0.0161977	14	14	0.3366	8.01845e+08	0.0145473	19	19	0.3366	5.39731e+08	0.00731404	19	19	0.3366	1022381021	0.015338	20	20	0.3366	4.08083e+08	0.00806128	22	22	0.3366
Q01149	1372	0	0	0	0	0	0	0	0	0	0	0	0	0	0	0	0	0	0	0	0	0	0	0	0	0	0	0	0	0	0	2	2	0.0248	119614	4.88e-07	0	0	0	0	0	0	0	0	0	0	0	0	0
Q01279	1210	12	12	0.1174	4.36863e+07	0.000576144	12	12	0.1174	3.1409e+07	0.000645781	12	12	0.1174	6.656e+07	0.00106416	11	11	0.1174	5.10853e+07	0.000773667	15	15	0.1174	6.02781e+07	0.000409872	14	14	0.1174	3.73315e+07	0.00023117	15	15	0.1174	5.24792e+07	0.000242735	17	17	0.1174	57104902	0.000292411	18	18	0.1174	6.14671e+07	0.000414441	17	17	0.1174
Q01320	1528	0	0	0	0	0	0	0	0	0	0	0	0	0	0	0	0	0	0	0	0	0	0	0	0	0	0	0	0	0	0	0	0	0	0	0	0	0	0	0	0	0	0	0	0	0	0	0	0
Q01339	345	16	16	0.4667	1.14983e+08	0.00531845	17	17	0.4667	1.00022e+08	0.00721263	16	16	0.4667	1.21601e+08	0.00681865	15	15	0.4667	1.18358e+08	0.0062867	24	24	0.4667	2.525e+08	0.00602167	24	24	0.4667	3.17221e+08	0.00688944	27	27	0.4667	4.01718e+08	0.00651678	30	30	0.4667	409267317	0.00735011	25	25	0.4667	2.42382e+08	0.00573173	25	25	0.4667
Q01768	152	0	0	0	0	0	0	0	0	0	0	0	0	0	0	0	0	0	0	0	0	0	0	0	0	0	0	0	0	0	0	0	0	0	0	0	0	0	0	0	0	0	0	0	0	0	0	0	0
Q02105	246	0	0	0	0	0	0	0	0	0	0	2	2	0.0894	1.65667e+07	0.00130281	2	2	0.0894	1.65806e+07	0.00123512	3	3	0.0894	4.80044e+06	0.000160554	3	3	0.0894	5.37405e+06	0.000163684	1	1	0.0894	60646	1.38e-06	1	1	0.0894	43153.5	1.09e-06	2	2	0.0894	2.37962e+06	7.89e-05	1	1	0.0894
Q03311	603	0	0	0	0	0	0	0	0	0	0	0	0	0	0	0	0	0	0	0	0	1	1	0.0149	695796	9.49e-06	0	0	0	0	0	1	1	0.0149	818878	7.6e-06	2	2	0.0149	1.09785e+06	1.13e-05	2	2	0.0149	1.10121e+06	1.49e-05	0	0	0
Q03734	418	1	1	0.2081	1.32844e+06	5.07e-05	1	1	0.2081	1.17115e+06	6.97e-05	0	0	0	0	0	0	0	0	0	0	4	4	0.2081	6029770	0.000118686	5	5	0.2081	6.25323e+06	0.00011209	3	3	0.2081	5.69529e+06	7.63e-05	5	5	0.2081	7.23874e+06	0.000107298	5	5	0.2081	9.92446e+06	0.000193703	5	5	0.2081
Q05020	97	0	0	0	0	0	0	0	0	0	0	0	0	0	0	0	0	0	0	0	0	1	1	0.2371	785041	6.66e-05	1	1	0.2371	1.13964e+06	8.8e-05	6	6	0.2371	8.83647e+06	0.000509844	4	4	0.2371	6.76492e+06	0.000432113	1	1	0.2371	1.10516e+06	9.3e-05	1	1	0.2371
Q06770	397	2	2	0.0705	1.73209e+06	6.96e-05	0	0	0	0	0	0	0	0	0	0	0	0	0	0	0	5	5	0.0705	1.30357e+07	0.000270159	4	4	0.0705	6.05089e+06	0.000114201	9	9	0.0705	4.39762e+07	0.000619952	10	10	0.0705	3.371e+07	0.000526108	10	10	0.0705	3.68005e+07	0.000756256	11	11	0.0705
Q06890	448	4	4	0.1317	7.06666e+06	0.000251714	5	5	0.1317	5852449	0.000324995	4	4	0.1317	6.82486e+06	0.00029471	5	5	0.1317	7.13034e+06	0.000291659	17	17	0.1317	124106136	0.00227924	18	18	0.1317	1.12253e+08	0.00187741	20	20	0.1317	1.49112e+08	0.00186279	21	21	0.1317	1.96045e+08	0.00271134	20	20	0.1317	9.25738e+07	0.00168584	21	21	0.1317
Q07456	349	7	7	0.1805	3.21848e+07	0.00147163	4	4	0.1805	2.44496e+07	0.00174286	5	5	0.1805	3.34958e+07	0.00185671	5	5	0.1805	3.45297e+07	0.00181306	7	7	0.1805	6.37268e+07	0.00150235	7	7	0.1805	6.30379e+07	0.00135337	8	8	0.1805	6.31531e+07	0.00101274	9	9	0.1805	69723195	0.00123782	7	7	0.1805	5.03435e+07	0.00117686	7	7	0.1805
Q07968	669	5	5	0.0972	8.12357e+06	0.000193773	5	5	0.0972	7.94109e+06	0.000295305	10	10	0.0972	1.88076e+07	0.000543858	9	9	0.0972	17751660	0.000486246	10	10	0.0972	13576745	0.000166972	10	10	0.0972	1.27626e+07	0.00014294	11	11	0.0972	7.58403e+07	0.000634461	12	12	0.0972	2.9519e+07	0.00027339	10	10	0.0972	1.0396e+07	0.000126778	10	10	0.0972
Q08761	675	0	0	0	0	0	0	0	0	0	0	0	0	0	0	0	0	0	0	0	0	0	0	0	0	0	0	0	0	0	0	0	0	0	0	0	1	1	0.0119	871175	8e-06	2	2	0.0119	1.19973e+06	1.45e-05	0	0	0
Q08879	705	4	4	0.078	5.52278e+06	0.000125009	3	3	0.078	4.2213e+06	0.000148961	6	6	0.078	9.26736e+06	0.0002543	5	5	0.078	8.50565e+06	0.000221086	4	4	0.078	3.81053e+06	4.45e-05	3	3	0.078	1833510	1.95e-05	2	2	0.078	2.20613e+06	1.75e-05	2	2	0.078	2.20567e+06	1.94e-05	3	3	0.078	3.78152e+06	4.38e-05	2	2	0.078
Q3UCQ1	651	0	0	0	0	0	0	0	0	0	0	0	0	0	0	0	0	0	0	0	0	0	0	0	0	0	1	1	0.0123	1212158	1.4e-05	0	0	0	0	0	0	0	0	0	0	0	0	0	0	0	0	0	0
Q3UH53	2193	0	0	0	0	0	0	0	0	0	0	0	0	0	0	0	0	0	0	0	0	0	0	0	0	0	0	0	0	0	0	0	0	0	0	0	0	0	0	0	0	0	0	0	0	0	0	0	0
Q3UV17	594	0	0	0	0	0	0	0	0	0	0	0	0	0	0	0	0	0	0	0	0	1	1	0.0152	5.72574e+06	7.93e-05	1	1	0.0152	5.76948e+06	7.28e-05	0	0	0	0	0	1	1	0.0152	6.7717e+06	7.06e-05	0	0	0	0	0	0	0	0
Q3V209	319	0	0	0	0	0	0	0	0	0	0	1	1	0.047	1.3458e+07	0.000816146	0	0	0	0	0	0	0	0	0	0	0	0	0	0	0	0	0	0	0	0	0	0	0	0	0	0	0	0	0	0	0	0	0
Q497V5	982	1	1	0.0092	8.3341e+06	0.000135431	1	1	0.0092	6.69432e+06	0.000169594	0	0	0	0	0	1	1	0.0092	7.49929e+06	0.000139943	0	0	0	0	0	1	1	0.0092	4.51616e+06	3.45e-05	0	0	0	0	0	0	0	0	0	0	0	0	0	0	0	0	0	0
Q5I2A0	440	0	0	0	0	0	0	0	0	0	0	0	0	0	0	0	0	0	0	0	0	0	0	0	0	0	0	0	0	0	0	0	0	0	0	0	1	1	0.0341	1.13711e+06	1.6e-05	0	0	0	0	0	0	0	0
Q60590	207	0	0	0	0	0	3	3	0.0821	1.46702e+07	0.00176312	2	2	0.0821	18429997	0.0017224	2	2	0.0821	1.67971e+07	0.00148699	4	4	0.0821	51522251	0.00204785	4	4	0.0821	5.16425e+07	0.00186929	7	7	0.0821	6.76501e+07	0.00182906	4	4	0.0821	6.3458e+07	0.00189943	6	6	0.0821	75953269	0.00299352	6	6	0.0821
Q60994	247	0	0	0	0	0	0	0	0	0	0	0	0	0	0	0	0	0	0	0	0	0	0	0	0	0	0	0	0	0	0	1	1	0.0486	875269	1.98e-05	1	1	0.0486	1.03834e+06	2.6e-05	1	1	0.0486	795464	2.63e-05	1	1	0.0486
Q61129	603	19	19	0.3234	1.2852e+08	0.00340114	21	21	0.3234	9.94538e+07	0.00410318	22	22	0.3234	1.3974e+08	0.00448315	22	22	0.3234	121895817	0.00370438	20	20	0.3234	1.39569e+08	0.00190435	21	21	0.3234	1.46325e+08	0.0018182	23	23	0.3234	1.57762e+08	0.00146425	20	20	0.3234	1.33306e+08	0.00136974	20	20	0.3234	1.31135e+08	0.00177421	21	21	0.3234
Q61147	1061	34	34	0.3129	208326705	0.00313329	34	34	0.3129	1.84455e+08	0.00432507	36	36	0.3129	2.12864e+08	0.0038812	36	36	0.3129	2.09043e+08	0.00361047	50	50	0.3129	3.51535e+08	0.00272601	47	47	0.3129	3.4784e+08	0.00245643	52	52	0.3129	4.19105e+08	0.00221074	48	48	0.3129	3.73537e+08	0.00218135	46	46	0.3129	2.76428e+08	0.00212555	49	49	0.3129
Q61171	198	0	0	0	0	0	0	0	0	0	0	0	0	0	0	0	0	0	0	0	0	5	5	0.3737	5.66072e+06	0.000235224	5	5	0.3737	6.94533e+06	0.000262826	4	4	0.3737	8.06677e+06	0.000228016	4	4	0.3737	6.72288e+06	0.000210376	1	1	0.3737	277148	1.14e-05	0	0	0
Q61207	557	0	0	0	0	0	0	0	0	0	0	0	0	0	0	0	0	0	0	0	0	1	1	0.0197	456468	6.74e-06	1	1	0.0197	555856	7.48e-06	0	0	0	0	0	0	0	0	0	0	0	0	0	0	0	0	0	0
Q61247	491	16	16	0.2403	6.00755e+07	0.00195248	16	16	0.2403	6.72457e+07	0.00340721	17	17	0.2403	6.54216e+07	0.00257762	15	15	0.2403	3.41393e+07	0.00127414	15	15	0.2403	1.4015e+08	0.00234848	15	15	0.2403	1.65686e+08	0.00252839	18	18	0.2403	1.59363e+08	0.0018165	19	19	0.2403	1.34335e+08	0.00169517	17	17	0.2403	1.22256e+08	0.0020314	19	19	0.2403
Q61268	124	0	0	0	0	0	0	0	0	0	0	0	0	0	0	0	0	0	0	0	0	1	1	0.0887	4.27841e+06	0.00028388	1	1	0.0887	4.56761e+06	0.000275999	3	3	0.0887	1.28021e+07	0.000577817	2	2	0.0887	1.15739e+07	0.000578313	2	2	0.0887	6.25744e+06	0.0004117	2	2	0.0887
Q61508	559	5	5	0.0716	3.16171e+06	9.03e-05	2	2	0.0716	1.68853e+06	7.51e-05	3	3	0.0716	2.28565e+06	7.91e-05	3	3	0.0716	4.19306e+06	0.000137456	7	7	0.0716	1.089e+07	0.000160285	7	7	0.0716	1.01908e+07	0.000136596	7	7	0.0716	7.75338e+06	7.76e-05	7	7	0.0716	6.75394e+06	7.49e-05	7	7	0.0716	8278306	0.000120819	6	6	0.0716
Q61646	347	0	0	0	0	0	0	0	0	0	0	0	0	0	0	0	0	0	0	0	0	0	0	0	0	0	0	0	0	0	0	0	0	0	0	0	0	0	0	0	0	0	0	0	0	0	0	0	0
Q61702	907	11	11	0.151	3.6853e+07	0.000648392	12	12	0.151	3.22122e+07	0.000883546	15	15	0.151	4.10859e+07	0.000876324	14	14	0.151	4.17822e+07	0.000844165	23	23	0.151	1.24287e+08	0.00112744	25	25	0.151	1.2875e+08	0.00106361	24	24	0.151	7.59546e+07	0.000468681	26	26	0.151	9.92309e+07	0.000677869	24	24	0.151	1.17537e+08	0.00105723	24	24	0.151
Q61703	946	10	10	0.1152	6.51912e+07	0.00109969	12	12	0.1152	5.89951e+07	0.00155146	9	9	0.1152	6.45464e+07	0.00131996	11	11	0.1152	6.65481e+07	0.0012891	17	17	0.1152	1.15019e+08	0.00100035	19	19	0.1152	9.84932e+07	0.00078011	24	24	0.1152	1.60441e+08	0.000949192	22	22	0.1152	1.25236e+08	0.000820248	25	25	0.1152	1.3745e+08	0.00118538	24	24	0.1152
Q61704	889	8	8	0.0945	2.58979e+07	0.000464873	7	7	0.0945	2.94735e+07	0.000824796	11	11	0.0945	3.76601e+07	0.00081952	7	7	0.0945	1.74426e+07	0.000359545	16	16	0.0945	5.90466e+07	0.000546472	16	16	0.0945	60417037	0.000509212	21	21	0.0945	4.34273e+07	0.000273395	19	19	0.0945	4.39358e+07	0.000306212	18	18	0.0945	5.04438e+07	0.000462926	17	17	0.0945
Q61730	570	5	5	0.0842	11976701	0.0003353	6	6	0.0842	6.35538e+06	0.000277385	6	6	0.0842	4.61605e+06	0.000156666	5	5	0.0842	1.00191e+07	0.000322104	12	12	0.0842	4.27006e+07	0.000616359	10	10	0.0842	34274943	0.00045055	7	7	0.0842	3.57724e+07	0.000351239	6	6	0.0842	3.60591e+07	0.000391965	9	9	0.0842	33718648	0.000482615	8	8	0.0842
Q61838	1495	72	72	0.509	1583890401	0.0169066	66	66	0.509	1008004398	0.016774	73	73	0.509	1646524763	0.0213062	62	62	0.509	1144811045	0.0140325	137	137	0.509	3942549518	0.0216975	137	137	0.509	4157800047	0.0208383	151	151	0.509	6293883727	0.0235618	150	150	0.509	5605313994	0.0232308	136	136	0.509	4633250911	0.0252843	139	139	0.509
Q62009	838	0	0	0	0	0	0	0	0	0	0	0	0	0	0	0	0	0	0	0	0	0	0	0	0	0	0	0	0	0	0	0	0	0	0	0	0	0	0	0	0	0	0	0	0	0	0	0	0
Q62168	407	0	0	0	0	0	0	0	0	0	0	0	0	0	0	0	0	0	0	0	0	1	1	0.0172	159073	3.22e-06	0	0	0	0	0	0	0	0	0	0	0	0	0	0	0	0	0	0	0	0	0	0	0
Q62351	763	0	0	0	0	0	0	0	0	0	0	0	0	0	0	0	0	0	0	0	0	2	2	0.0301	912176	9.84e-06	1	1	0.0301	799063	7.85e-06	0	0	0	0	0	0	0	0	0	0	0	0	0	0	0	0	0	0
Q64726	307	6	6	0.3127	9.95292e+06	0.000517349	7	7	0.3127	1.08933e+07	0.000882747	7	7	0.3127	1.11273e+07	0.000701182	6	6	0.3127	1.14219e+07	0.00068178	16	16	0.3127	5.2761e+07	0.001414	18	18	0.3127	5.58267e+07	0.00136253	14	14	0.3127	6.25903e+07	0.00114104	16	16	0.3127	5.72641e+07	0.00115571	12	12	0.3127	4.14838e+07	0.00110242	13	13	0.3127
Q69Z23	4481	0	0	0	0	0	0	0	0	0	0	0	0	0	0	0	0	0	0	0	0	0	0	0	0	0	0	0	0	0	0	0	0	0	0	0	0	0	0	0	0	0	0	0	0	0	0	0	0
Q6ZWR6	8799	0	0	0	0	0	0	0	0	0	0	0	0	0	0	0	0	0	0	0	0	0	0	0	0	0	0	0	0	0	0	0	0	0	0	0	0	0	0	0	0	0	0	0	0	0	0	0	0
Q80UW5	1551	0	0	0	0	0	0	0	0	0	0	0	0	0	0	0	0	0	0	0	0	0	0	0	0	0	0	0	0	0	0	0	0	0	0	0	0	0	0	0	0	0	0	0	0	0	0	0	0
Q80X76	445	0	0	0	0	0	1	1	0.0315	1.99953e+06	0.000111785	1	1	0.0315	1.09668e+06	4.77e-05	0	0	0	0	0	1	1	0.0315	3.49868e+06	6.47e-05	2	2	0.0315	2.40264e+06	4.05e-05	1	1	0.0315	1.36901e+07	0.000172178	2	2	0.0315	1.83878e+07	0.000256021	2	2	0.0315	4.1394e+06	7.59e-05	2	2	0.0315
Q80YC5	597	16	16	0.3233	3.4638e+07	0.000925869	13	13	0.3233	2.42776e+07	0.00101169	13	13	0.3233	37357308	0.00121054	14	14	0.3233	3.86201e+07	0.00118545	14	14	0.3233	32080951	0.000442127	12	12	0.3233	4.20421e+07	0.000527656	13	13	0.3233	20003532	0.000187527	13	13	0.3233	2.4125e+07	0.00025038	14	14	0.3233	2.37734e+07	0.00032488	14	14	0.3233
Q8BFZ3	376	1	1	0.0904	2.66303e+06	0.000113021	0	0	0	0	0	1	1	0.0904	1.31834e+06	6.78e-05	0	0	0	0	0	0	0	0	0	0	0	0	0	0	0	0	0	0	0	0	0	0	0	0	0	0	0	0	0	0	0	0	0
Q8BH35	589	11	11	0.2632	2.27768e+07	0.000617091	12	12	0.2632	2.86259e+07	0.0012091	13	13	0.2632	3.66081e+07	0.00120238	12	12	0.2632	3.4678e+07	0.0010789	21	21	0.2632	1.02403e+08	0.00143045	18	18	0.2632	111318066	0.00141609	17	17	0.2632	9.77461e+07	0.000928784	19	19	0.2632	1.11444e+08	0.00117233	22	22	0.2632	1.13678e+08	0.00157459	18	18	0.2632
Q8BH61	732	4	4	0.0505	5.06168e+06	0.000110346	4	4	0.0505	3.92665e+06	0.000133453	4	4	0.0505	4.59586e+06	0.000121461	4	4	0.0505	4.50924e+06	0.000112885	7	7	0.0505	7.95002e+06	8.94e-05	7	7	0.0505	8.54969e+06	8.75e-05	10	10	0.0505	1.63076e+07	0.000124684	11	11	0.0505	1.86583e+07	0.000157931	6	6	0.0505	6.30707e+06	7.03e-05	8	8	0.0505
Q8BK48	559	0	0	0	0	0	0	0	0	0	0	0	0	0	0	0	0	0	0	0	0	2	2	0.0394	1.08462e+06	1.6e-05	2	2	0.0394	943157	1.26e-05	0	0	0	0	0	0	0	0	0	0	0	0	0	0	0	1	1	0.0394
Q8BND5	748	2	2	0.0281	1.74409e+06	3.72e-05	1	1	0.0281	555765	1.85e-05	2	2	0.0281	2.42282e+06	6.27e-05	2	2	0.0281	2.35885e+06	5.78e-05	6	6	0.0281	9.2545e+06	0.000101795	10	10	0.0281	1.79645e+07	0.000179951	8	8	0.0281	2.03045e+07	0.000151922	10	10	0.0281	2.14374e+07	0.000177573	9	9	0.0281	1.87671e+07	0.000204692	10	10	0.0281
Q8BPB5	493	2	2	0.0548	1.07549e+06	3.48e-05	1	1	0.0548	321016	1.62e-05	4	4	0.0548	1854405	7.28e-05	5	5	0.0548	2.07696e+06	7.72e-05	2	2	0.0548	1.28742e+06	2.15e-05	2	2	0.0548	1228483	1.87e-05	0	0	0	0	0	0	0	0	0	0	1	1	0.0548	524624	8.68e-06	0	0	0
Q8CFG8	688	0	0	0	0	0	1	1	0.0145	2.73686e+08	0.00989647	0	0	0	0	0	0	0	0	0	0	0	0	0	0	0	0	0	0	0	0	0	0	0	0	0	0	0	0	0	0	0	0	0	0	0	0	0	0
Q8CG14	688	2	2	0.0494	3.008e+06	6.98e-05	2	2	0.0494	2.33167e+06	8.43e-05	2	2	0.0494	3296021	9.27e-05	2	2	0.0494	3.21077e+06	8.55e-05	8	8	0.0494	7.60821e+06	9.1e-05	3	3	0.0494	3.25558e+06	3.55e-05	5	5	0.0494	5.028e+06	4.09e-05	7	7	0.0494	6.98692e+06	6.29e-05	6	6	0.0494	6.11555e+06	7.25e-05	6	6	0.0494
Q8CG16	707	2	2	0.1669	3.50097e+06	7.9e-05	1	1	0.1669	1.33188e+06	4.69e-05	1	1	0.1669	1.81191e+06	4.96e-05	1	1	0.1669	1.97526e+06	5.12e-05	4	4	0.1669	3.6314e+06	4.23e-05	4	4	0.1669	3.57948e+06	3.79e-05	3	3	0.1669	2636062	2.09e-05	3	3	0.1669	2.82972e+06	2.48e-05	3	3	0.1669	3804646	4.39e-05	3	3	0.1669
Q8CI43	207	0	0	0	0	0	0	0	0	0	0	0	0	0	0	0	0	0	0	0	0	0	0	0	0	0	0	0	0	0	0	0	0	0	0	0	0	0	0	0	0	0	0	0	0	0	0	0	0
Q8CIE0	424	0	0	0	0	0	0	0	0	0	0	0	0	0	0	0	0	0	0	0	0	0	0	0	0	0	0	0	0	0	0	0	0	0	0	0	0	0	0	0	0	0	0	0	0	0	0	0	0
Q8CIZ8	2813	2	2	0.0071	2.94378e+06	1.67e-05	2	2	0.0071	2.33032e+06	2.06e-05	3	3	0.0071	3.49608e+06	2.4e-05	2	2	0.0071	786820	5.13e-06	0	0	0	0	0	1	1	0.0071	267138	7.12e-07	5	5	0.0071	3.21756e+06	6.4e-06	6	6	0.0071	3.71433e+06	8.18e-06	5	5	0.0071	4.65844e+06	1.35e-05	5	5	0.0071
Q8K0D2	558	0	0	0	0	0	0	0	0	0	0	2	2	0.0412	1.74912e+06	6.06e-05	1	1	0.0412	448267	1.47e-05	1	1	0.0412	243499	3.59e-06	0	0	0	0	0	0	0	0	0	0	2	2	0.0412	1.67375e+06	1.86e-05	0	0	0	0	0	2	2	0.0412
Q8K0E8	481	38	38	0.5489	2.81712e+08	0.00934612	38	38	0.5489	5.15584e+08	0.0266668	46	46	0.5489	5.02851e+08	0.0202243	40	40	0.5489	499249799	0.0190203	65	65	0.5489	1542956923	0.0263927	60	60	0.5489	1883946812	0.029347	55	55	0.5489	1305128217	0.0151858	56	56	0.5489	1381912198	0.0178009	57	57	0.5489	1190890860	0.0201991	55	55	0.5489
Q8K182	587	13	13	0.3118	5.0676e+07	0.00137764	12	12	0.3118	2.41895e+07	0.00102519	15	15	0.3118	4.91777e+07	0.00162072	15	15	0.3118	5.11856e+07	0.00159791	22	22	0.3118	7.27885e+07	0.00102023	22	22	0.3118	9.58257e+07	0.00122316	22	22	0.3118	5.35536e+07	0.0005106	21	21	0.3118	5.28792e+07	0.000558153	21	21	0.3118	7.23179e+07	0.00100511	22	22	0.3118
Q8K1I3	203	3	3	0.2069	2.0322e+06	0.00015975	0	0	0	0	0	3	3	0.2069	3.96669e+06	0.000378017	3	3	0.2069	4.24316e+06	0.000383033	3	3	0.2069	3.23992e+06	0.000131315	4	4	0.2069	3.47686e+06	0.000128331	4	4	0.2069	4.03264e+06	0.000111179	4	4	0.2069	5.10404e+06	0.000155784	1	1	0.2069	408204	1.64e-05	2	2	0.2069
Q8R0Z5	364	0	0	0	0	0	0	0	0	0	0	0	0	0	0	0	0	0	0	0	0	1	1	0.033	1.94782e+06	4.4e-05	1	1	0.033	3.76602e+06	7.75e-05	0	0	0	0	0	0	0	0	0	0	0	0	0	0	0	0	0	0
Q8R121	448	0	0	0	0	0	0	0	0	0	0	0	0	0	0	0	0	0	0	0	0	8	8	0.1808	1.93763e+07	0.00035585	9	9	0.1808	2.12947e+07	0.000356151	9	9	0.1808	1.69418e+07	0.000211646	11	11	0.1808	2.01334e+07	0.000278448	11	11	0.1808	2.66274e+07	0.000484905	9	9	0.1808
Q8R242	366	0	0	0	0	0	0	0	0	0	0	0	0	0	0	0	0	0	0	0	0	0	0	0	0	0	0	0	0	0	0	0	0	0	0	0	0	0	0	0	0	0	0	0	0	0	1	1	0.041
Q8VCE2	372	0	0	0	0	0	0	0	0	0	0	0	0	0	0	0	0	0	0	0	0	0	0	0	0	0	0	0	0	0	0	0	0	0	0	0	0	0	0	0	0	0	0	0	0	0	0	0	0
Q8VCG4	202	4	4	0.2327	1.45105e+07	0.00114631	3	3	0.2327	8.92114e+06	0.00109872	5	5	0.2327	1.98431e+07	0.00190036	5	5	0.2327	2.99554e+07	0.00271749	9	9	0.2327	2.24806e+07	0.000915653	6	6	0.2327	3.15467e+07	0.00117015	9	9	0.2327	2.11984e+07	0.00058733	9	9	0.2327	3.44081e+07	0.0010554	9	9	0.2327	3.40427e+07	0.00137492	9	9	0.2327
Q8VCM7	436	16	16	0.4197	3.17688e+08	0.0116275	14	14	0.4197	2.52314e+08	0.014397	21	21	0.4197	2.94349e+08	0.0130604	18	18	0.4197	3.08196e+08	0.0129534	47	47	0.4197	8.55287e+08	0.0161399	41	41	0.4197	8.85957e+08	0.0152253	42	42	0.4197	1195996389	0.0153523	51	51	0.4197	1230216214	0.0174824	41	41	0.4197	1112452083	0.0208161	42	42	0.4197
Q8VCS0	530	1	1	0.0189	761660	2.29e-05	0	0	0	0	0	1	1	0.0189	719143	2.62e-05	1	1	0.0189	769165	2.66e-05	5	5	0.0189	6968989	0.000108185	5	5	0.0189	7.96781e+06	0.000112643	4	4	0.0189	6.44609e+06	6.81e-05	3	3	0.0189	8.35735e+06	9.77e-05	6	6	0.0189	7.80007e+06	0.000120068	5	5	0.0189
Q8VCX2	364	0	0	0	0	0	0	0	0	0	0	0	0	0	0	0	0	0	0	0	0	0	0	0	0	0	0	0	0	0	0	0	0	0	0	0	0	0	0	0	0	0	0	0	0	0	0	0	0
Q8VG05	315	0	0	0	0	0	0	0	0	0	0	0	0	0	0	0	0	0	0	0	0	0	0	0	0	0	0	0	0	0	0	0	0	0	0	0	0	0	0	0	0	0	0	0	0	0	0	0	0
Q91VB4	1002	0	0	0	0	0	0	0	0	0	0	0	0	0	0	0	0	0	0	0	0	1	1	0.008	1.08669e+06	8.92e-06	0	0	0	0	0	0	0	0	0	0	1	1	0.008	2.4838e+06	1.54e-05	0	0	0	0	0	0	0	0
Q91VC3	411	0	0	0	0	0	0	0	0	0	0	0	0	0	0	0	0	0	0	0	0	0	0	0	0	0	0	0	0	0	0	0	0	0	0	0	0	0	0	0	0	0	0	0	0	0	0	0	0
Q91WP0	685	1	1	0.0146	923318	2.15e-05	1	1	0.0146	720694	2.62e-05	1	1	0.0146	1.09535e+06	3.09e-05	1	1	0.0146	1.11745e+06	2.99e-05	3	3	0.0146	5.06634e+06	6.09e-05	3	3	0.0146	5.07393e+06	5.55e-05	4	4	0.0146	1.12865e+07	9.22e-05	4	4	0.0146	1.11682e+07	0.000101018	3	3	0.0146	7.94232e+06	9.46e-05	4	4	0.0146
Q91WP6	418	1	1	0.0813	1626911	6.21e-05	1	1	0.0813	1.26005e+06	7.5e-05	1	1	0.0813	1.4612e+06	6.76e-05	1	1	0.0813	1.55173e+06	6.8e-05	7	7	0.0813	2.01189e+07	0.000396006	8	8	0.0813	2.02559e+07	0.000363092	6	6	0.0813	2.69125e+07	0.000360336	7	7	0.0813	2.42812e+07	0.000359914	8	8	0.0813	2.09947e+07	0.000409768	5	5	0.0813
Q91X72	460	30	30	0.6109	5.30466e+08	0.0184022	32	32	0.6109	4.17031e+08	0.0225542	30	30	0.6109	4.0548e+08	0.0170526	28	28	0.6109	4.08939e+08	0.0162909	46	46	0.6109	1741955563	0.0311569	50	50	0.6109	2043260500	0.0332818	56	56	0.6109	2287623768	0.0278328	55	55	0.6109	2496332194	0.0336241	51	51	0.6109	2225684045	0.039474	51	51	0.6109
Q920Q2	1249	0	0	0	0	0	0	0	0	0	0	0	0	0	0	0	0	0	0	0	0	0	0	0	0	0	0	0	0	0	0	0	0	0	0	0	0	0	0	0	0	0	0	0	0	0	0	0	0
Q921I1	697	70	70	0.7418	4339990510	0.0993636	71	71	0.7418	2852591415	0.101818	74	74	0.7418	3814746078	0.10588	70	70	0.7418	3711245124	0.0975732	94	94	0.7418	3698192824	0.0436547	95	95	0.7418	4062867104	0.0436758	107	107	0.7418	5564535757	0.0446814	108	108	0.7418	5965081228	0.0530261	95	95	0.7418	3626208140	0.0424449	92	92	0.7418
Q923D2	206	0	0	0	0	0	0	0	0	0	0	0	0	0	0	0	0	0	0	0	0	2	2	0.1456	258178	1.03e-05	0	0	0	0	0	0	0	0	0	0	0	0	0	0	0	0	0	0	0	0	0	0	0
Q99PT1	204	0	0	0	0	0	0	0	0	0	0	0	0	0	0	0	0	0	0	0	0	0	0	0	0	0	0	0	0	0	0	0	0	0	0	0	0	0	0	0	0	0	0	0	0	0	0	0	0
Q9CQW3	399	3	3	0.1128	6.79047e+06	0.000271581	4	4	0.1128	6.07848e+06	0.000379	3	3	0.1128	6.55779e+06	0.000317954	3	3	0.1128	8.96878e+06	0.000411911	3	3	0.1128	6.17099e+06	0.00012725	3	3	0.1128	6.65883e+06	0.000125045	4	4	0.1128	5.99222e+06	8.41e-05	5	5	0.1128	1.12932e+07	0.000175368	3	3	0.1128	3.53244e+06	7.22e-05	3	3	0.1128
Q9CYY7	195	0	0	0	0	0	0	0	0	0	0	0	0	0	0	0	0	0	0	0	0	0	0	0	0	0	0	0	0	0	0	0	0	0	0	0	0	0	0	0	0	0	0	0	0	0	0	0	0
Q9D6U8	155	0	0	0	0	0	0	0	0	0	0	0	0	0	0	0	0	0	0	0	0	0	0	0	0	0	1	1	0.0774	1.78211e+06	8.61e-05	0	0	0	0	0	0	0	0	0	0	0	0	0	0	0	0	0	0
Q9DBB9	547	7	7	0.1737	9.00162e+07	0.00262606	7	7	0.1737	7.32254e+07	0.00333036	7	7	0.1737	9.69071e+07	0.00342726	7	7	0.1737	9.4424e+07	0.00316329	10	10	0.1737	6.91817e+07	0.00104059	10	10	0.1737	7.24659e+07	0.00099263	12	12	0.1737	8.53938e+07	0.000873715	14	14	0.1737	87902129	0.000995676	11	11	0.1737	64468124	0.000961531	9	9	0.1737
Q9DBD0	700	18	18	0.2629	8.51587e+07	0.00194134	16	16	0.2629	6.40043e+07	0.00227472	16	16	0.2629	4.98424e+07	0.00137746	17	17	0.2629	5.55729e+07	0.00145482	34	34	0.2629	1.76069e+08	0.00206947	36	36	0.2629	1.86035e+08	0.0019913	36	36	0.2629	1.68078e+08	0.00134383	38	38	0.2629	1.94787e+08	0.00172412	35	35	0.2629	1.78941e+08	0.00208553	39	39	0.2629
Q9ESB3	525	18	18	0.2686	1.21094e+08	0.00368074	17	17	0.2686	8.20556e+07	0.00388835	16	16	0.2686	1.26938e+08	0.00467746	16	16	0.2686	1.40429e+08	0.00490162	19	19	0.2686	1.1586e+08	0.00181571	20	20	0.2686	120545703	0.00172042	19	19	0.2686	1.08786e+08	0.0011597	17	17	0.2686	8.46596e+07	0.000999133	20	20	0.2686	7.64438e+07	0.00118792	21	21	0.2686
Q9ET66	498	1	1	0.0663	412072	1.32e-05	0	0	0	0	0	1	1	0.0663	279186	1.08e-05	2	2	0.0663	556319	2.05e-05	0	0	0	0	0	0	0	0	0	0	0	0	0	0	0	1	1	0.0663	88977.9	1.11e-06	0	0	0	0	0	1	1	0.0663
Q9JHH6	422	5	5	0.1137	8.17295e+06	0.000309056	3	3	0.1137	6098995	0.000359553	4	4	0.1137	9.40129e+06	0.000430977	4	4	0.1137	9.12761e+06	0.000396358	7	7	0.1137	1.32857e+07	0.000259029	9	9	0.1137	1.63791e+07	0.000290816	7	7	0.1137	1.37153e+07	0.000181896	6	6	0.1137	1.65869e+07	0.000243533	8	8	0.1137	1.2785e+07	0.00024717	6	6	0.1137
Q9JJN5	457	2	2	0.07	6.75951e+06	0.000236032	3	3	0.07	6.43672e+06	0.000350401	2	2	0.07	7.29129e+06	0.000308651	3	3	0.07	7.47085e+06	0.00029957	9	9	0.07	2.2183e+07	0.000399373	8	8	0.07	2.01345e+07	0.000330116	11	11	0.07	2.39602e+07	0.000293431	16	16	0.07	3.56112e+07	0.00048281	11	11	0.07	2.49243e+07	0.000444951	12	12	0.07
Q9QWK4	352	6	6	0.2301	7311237	0.000331451	6	6	0.2301	6.15122e+06	0.000434745	9	9	0.2301	1.38197e+07	0.000759512	9	9	0.2301	1.30064e+07	0.000677109	13	13	0.2301	15753554	0.000368222	13	13	0.2301	1.50301e+07	0.000319933	10	10	0.2301	17314981	0.000275302	12	12	0.2301	1.40458e+07	0.000247235	8	8	0.2301	8.42492e+06	0.000195267	12	12	0.2301
Q9QXC1	388	8	8	0.2835	8.00911e+07	0.003294	9	9	0.2835	6.90046e+07	0.00442448	9	9	0.2835	1.45098e+08	0.00723449	9	9	0.2835	1.31975e+08	0.0062331	13	13	0.2835	1.39634e+08	0.00296096	10	10	0.2835	8.69141e+08	0.0167842	11	11	0.2835	9.56591e+07	0.00137983	12	12	0.2835	6.20914e+08	0.0099153	13	13	0.2835	1.57221e+08	0.00330586	12	12	0.2835
Q9R098	653	2	2	0.0459	3.18982e+06	7.8e-05	2	2	0.0459	2.33232e+06	8.89e-05	2	2	0.0459	3.13004e+06	9.27e-05	2	2	0.0459	3.26702e+06	9.17e-05	3	3	0.0459	9.32373e+07	0.00117476	4	4	0.0459	4.07414e+06	4.67e-05	0	0	0	0	0	2	2	0.0459	1948853	1.85e-05	2	2	0.0459	3.09794e+06	3.87e-05	3	3	0.0459
Q9R0R1	738	0	0	0	0	0	0	0	0	0	0	1	1	0.0095	2.22931e+06	5.84e-05	0	0	0	0	0	0	0	0	0	0	0	0	0	0	0	0	0	0	0	0	0	0	0	0	0	0	0	0	0	0	0	0	0
Q9R0Y5	194	0	0	0	0	0	0	0	0	0	0	0	0	0	0	0	0	0	0	0	0	0	0	0	0	0	0	0	0	0	0	0	0	0	0	0	0	0	0	0	0	0	0	0	0	0	0	0	0
Q9WVJ3	470	0	0	0	0	0	0	0	0	0	0	0	0	0	0	0	0	0	0	0	0	3	3	0.066	2.00058e+06	3.5e-05	4	4	0.066	2.12274e+06	3.38e-05	2	2	0.066	859976	1.02e-05	2	2	0.066	673183	8.87e-06	3	3	0.066	1.51579e+06	2.63e-05	4	4	0.066
Q9Z126	105	0	0	0	0	0	0	0	0	0	0	0	0	0	0	0	0	0	0	0	0	0	0	0	0	0	0	0	0	0	0	0	0	0	0	0	0	0	0	0	0	0	0	0	0	0	0	0	0
Q9Z1R3	190	5	5	0.2	37294689	0.00313231	7	7	0.2	36226994	0.00474346	4	4	0.2	37244299	0.00379215	7	7	0.2	4.33247e+07	0.00417855	6	6	0.2	6.8378e+07	0.00296099	7	7	0.2	6.97536e+07	0.00275077	6	6	0.2	3.64532e+07	0.00107377	4	4	0.2	5.02225e+07	0.00163776	4	4	0.2	3.98657e+07	0.00171179	6	6	0.2
Q9Z1T2	963	0	0	0	0	0	0	0	0	0	0	2	2	0.0467	559413	1.12e-05	2	2	0.0467	500119	9.52e-06	0	0	0	0	0	0	0	0	0	0	0	0	0	0	0	0	0	0	0	0	0	0	0	0	0	0	0	0
[truncated: 63 more columns]
