# Supplementary material for: Experimental Bothrops atrox Envenomation: Blood Plasma Proteome Effects after Local Tissue Damage and Perspectives on Thromboinflammation
Source: Toxins (Basel). 2022 Sep 1;14(9):613. doi: 10.3390/toxins14090613 (PMC9503785; doi:10.3390/toxins14090613)
Supplement: Supplementary file 1 [file toxins-14-00613-s001.zip › Supplementary Material Table S2.xlsx]

## Sheet: Title
Supplementary Material Table S2: Proteins with differentially significant abundance by Log-Fold change.
Experimental Bothrops atrox envenomation: blood plasma proteome effects after local tissue damage and perspectives on thromboinflammation
Joeliton S. Cavalcante1*, Ingrid Mayara C. de Brito1, Laudicéia Alves de Oliveira1, Luciana Curtolo de Barros2, Cayo Almeida3, Bruno Cesar Rossini4,5, Duaran Lopes Sousa6, Renata Sousa Alves6, Roberta Jeane Bezerra Jorge7,8, Lucilene Delazari dos Santos1,4,9*
1 Graduate Program in Tropical Diseases, Botucatu Medical School (FMB), São Paulo State University (UNESP), Botucatu, SP, Brazil.
2 Center for the Study of Venoms and Venomous Animals (CEVAP), São Paulo State University (UNESP), Botucatu, SP, Brazil.
3 Center of Mathematics, Computing Sciences and Cognition, Federal University of ABC, São Paulo, SP, Brazil.
4 Biotechnology Institute (IBTEC), São Paulo State University (UNESP), Botucatu, SP, Brazil.
5 Department of Chemical and Biological Sciences, São Paulo State University (UNESP), Botucatu, SP, Brazil.
6 Department of Clinical and Toxicological Analysis, Federal University of Ceará, Fortaleza, CE, Brazil.
7 Drug Research and Development Center, Federal University of Ceará (UFC), Fortaleza, CE, Brazil
8 Department of Physiology and Pharmacology, School of Medicine, Federal University of Ceará (UFC), Fortaleza, CE, Brazil.
9 Graduate Program in Research and Development (Medical Biotechnology), Botucatu Medical School (FMB), São Paulo State University (UNESP), Botucatu, SP, Brazil.
*Correspondence: lucilene.delazari@unesp.br (LDS); joeliton.calcavante@unesp.br (JSC)

## Sheet: Data
Proteins with differentially significant abundance - 1.2µg				Proteins with differentially significant abundance - 2.5µg				Proteins with differentially significant abundance - 5.0µg
ID protein	Fold Change	log2(FC)		ID protein	Fold Change	log2(FC)		ID protein	Fold Change	log2(FC)
B5X0G2	2.4716	1.3054		E9Q414	2.6903	1.4277		A2ASS6	0.49993	-1.0002
O08677	0.4633	-1.11		O08677	0.45753	-1.1281		B5X0G2	2.8507	1.5113
O09164	0.057452	-4.1215		O09164	0.024113	-5.374		E9Q414	2.1279	1.0894
O35664	14.385	3.8465		O35664	5.0291	2.3303		O08677	0.4921	-1.023
O35930	4.6625	2.2211		O88968	8.9132	3.1559		O35664	5.4561	2.4479
O70165	2.7373	1.4528		P01029	2.7712	1.4705		O35930	19.248	4.2666
O88783	0.48935	-1.0311		P01592	0.26981	-1.89		O70165	2.7514	1.4602
O88968	2.9726	1.5717		P01631	5.8468	2.5477		O88700	0.49993	-1.0002
P00687	2.6612	1.4121		P01633	5.9143	2.5642		O88968	4.2543	2.0889
P01029	3.5022	1.8083		P01635	5.0532	2.3372		P00920	2.3513	1.2335
P01592	0.13267	-2.914		P01642	8.058	3.0104		P01029	6.6975	2.7436
P01631	5.9255	2.5669		P01674	17.258	4.1092		P01592	0.033587	-4.896
P01635	3.706	1.8899		P01680	6.3368	2.6637		P01639	0.31598	-1.6621
P01642	4.2039	2.0717		P01728	42.541	5.4108		P01674	6.9755	2.8023
P01674	5.2601	2.3951		P01801	24.907	4.6385		P01680	6.4143	2.6813
P01680	6.0217	2.5902		P01837	0.2865	-1.8034		P01801	3.1679	1.6635
P01728	14.391	3.8471		P01843	2.4422	1.2882		P01837	0.048517	-4.3654
P01801	2.4218	1.2761		P01844	8.5139	3.0898		P01867	9.5123	3.2498
P01804	15.214	3.9273		P01867	8.5978	3.104		P01878	3.3269	1.7342
P01837	0.059076	-4.0813		P01878	9.1358	3.1915		P01942	36.898	5.2055
P01844	11.273	3.4948		P01942	15.511	3.9552		P02088	37.707	5.2368
P01867	9.3982	3.2324		P02088	13.95	3.8022		P02089	21.455	4.4232
P01878	13.463	3.7509		P02089	5.9815	2.5805		P03953	0.21535	-2.2152
P01942	18.566	4.2146		P03953	0.41537	-1.2675		P04247	11.577	3.5331
P02088	14.887	3.896		P03987	3.0199	1.5945		P04939	0.13119	-2.9302
P02089	7.3647	2.8806		P04247	2.6296	1.3949		P05017	0.0756	-3.7255
P03953	0.3022	-1.7264		P04939	0.13155	-2.9263		P05064	3.0332	1.6008
P04939	0.13132	-2.9288		P04945	11.557	3.5307		P06683	2.2402	1.1636
P05017	0.12686	-2.9787		P05017	0.061027	-4.0344		P06728	2.3711	1.2456
P06728	2.8217	1.4966		P06728	2.3679	1.2436		P07309	0.38033	-1.3947
P06909	0.45583	-1.1334		P06909	0.40829	-1.2923		P07310	181.19	7.5014
P07309	0.44003	-1.1843		P07758	8.2732	3.0484		P07758	10.575	3.4026
P07758	12.245	3.6141		P07759	2.6346	1.3976		P07759	2.3588	1.2381
P07759	2.5942	1.3753		P08121	0.14948	-2.742		P08121	0.14907	-2.7459
P08121	0.14922	-2.7445		P08226	2.8413	1.5065		P08226	3.0628	1.6148
P08226	2.659	1.4109		P09581	0.34966	-1.516		P08228	6.8981	2.7862
P09581	0.30928	-1.693		P09813	13.691	3.7752		P09411	2.8671	1.5196
P09813	13.891	3.7961		P10605	16.643	4.0569		P09581	0.46236	-1.1129
P10605	7.2189	2.8518		P11588	4.3894	2.134		P09813	10.529	3.3962
P11588	3.834	1.9388		P11589	48.604	5.603		P10605	21.266	4.4105
P11589	5.9723	2.5783		P11859	3.8779	1.9553		P11087	0.17185	-2.5408
P11859	4.2887	2.1005		P14106	2.415	1.272		P11352	2.5202	1.3335
P14847	0.21236	-2.2354		P16294	7.968	2.9942		P11404	7.8748	2.9772
P16294	7.1114	2.8301		P18529	10.28	3.3618		P11588	5.2962	2.4049
P22599	3.7192	1.895		P21180	2.6728	1.4184		P11589	30.743	4.9422
P23953	2.7467	1.4577		P22599	4.6482	2.2167		P11859	3.8958	1.9619
P26928	0.079139	-3.6595		P23953	3.3823	1.758		P12710	3.1556	1.6579
P28798	0.079102	-3.6601		P26928	0.064285	-3.9594		P13634	9.2993	3.2171
P31532	8.0759	3.0136		P28798	0.16666	-2.585		P14106	2.0947	1.0667
P31725	7.3099	2.8699		P29699	0.48624	-1.0403		P14152	2.8816	1.5269
P33587	0.496	-1.0116		P31532	7.8691	2.9762		P15327	10.133	3.341
P33622	15.134	3.9198		P31725	3.2585	1.7042		P16015	2.5607	1.3565
P34928	61.633	5.9456		P33587	0.43964	-1.1856		P16294	11.154	3.4795
P35441	2.4861	1.3139		P33622	6.8868	2.7838		P16858	2.7698	1.4698
P46412	6.0427	2.5952		P34928	9.0124	3.1719		P17742	16.707	4.0624
P47791	0.19914	-2.3282		P46412	6.9603	2.7991		P17751	4.5739	2.1934
P47878	0.31318	-1.675		P47791	0.19949	-2.3256		P19157	3.7152	1.8934
P49182	6.7323	2.7511		P47878	0.32414	-1.6253		P22599	3.0517	1.6096
P51885	0.45568	-1.1339		P49182	7.8485	2.9724		P23953	2.8512	1.5116
P52480	0.030513	-5.0344		P51885	0.46709	-1.0982		P24270	2.3451	1.2297
P55065	10.015	3.3241		P52480	0.030566	-5.0319		P26928	0.18557	-2.43
P70274	7.2409	2.8562		P55065	8.9107	3.1555		P28798	0.40247	-1.313
P70389	17.445	4.1247		P70274	6.082	2.6045		P31532	16.621	4.055
P97298	7.2462	2.8572		P70389	14.996	3.9065		P32261	0.47369	-1.078
P98064	3.5412	1.8243		P84751	4.4083	2.1402		P32848	16.488	4.0434
P98086	6.4981	2.7		P97298	7.5174	2.9102		P33587	0.3683	-1.441
Q00623	4.9649	2.3118		P98064	3.6939	1.8851		P33622	24.961	4.6416
Q00896	31.197	4.9633		P98086	7.7523	2.9546		P34928	53.087	5.7303
Q00897	4.6244	2.2093		Q00623	3.5458	1.8261		P35441	21.208	4.4065
Q00898	5.1807	2.3732		Q00896	14.188	3.8266		P35700	3.0266	1.5977
Q01279	0.41967	-1.2527		Q00897	3.1691	1.6641		P46412	9.0182	3.1728
Q02105	0.10712	-3.2227		Q00898	4.3571	2.1234		P47791	0.19895	-2.3295
Q03311	5.0758	2.3436		Q01279	0.49262	-1.0215		P47878	0.34187	-1.5485
Q03734	3.5118	1.8122		Q02105	0.20511	-2.2855		P49182	7.3468	2.8771
Q05020	16.488	4.0434		Q03311	18.261	4.1907		P51880	24575	14.585
Q06770	15.698	3.9725		Q03734	3.3193	1.7309		P51885	0.31365	-1.6728
Q06890	6.7501	2.7549		Q05020	8.5426	3.0947		P52480	0.030483	-5.0359
Q08761	3.0083	1.589		Q06770	16.128	4.0115		P55065	17.915	4.1631
Q08879	0.14459	-2.7899		Q06890	6.37	2.6713		P63017	2.8793	1.5257
Q3UV17	3.1319	1.6471		Q08761	5.121	2.3564		P70274	5.6565	2.4999
Q497V5	0.10202	-3.2931		Q08879	0.14212	-2.8148		P70296	2.517	1.3317
Q60994	4.3993	2.1373		Q3UV17	6.827	2.7713		P70389	26.249	4.7142
Q61129	0.42261	-1.2426		Q497V5	0.41625	-1.2645		P97298	11.662	3.5437
Q61171	69.528	6.1195		Q60994	6.7022	2.7446		P98064	3.8435	1.9424
Q61207	2.4293	1.2806		Q61129	0.35054	-1.5124		P98086	12.89	3.6882
Q61268	7.5121	2.9092		Q61171	7.5652	2.9194		Q00623	3.2083	1.6818
Q62351	2.5483	1.3495		Q61268	6.8491	2.7759		Q00896	10.458	3.3866
Q80X76	2.6672	1.4153		Q62351	3.1127	1.6381		Q00897	3.7016	1.8881
Q80YC5	0.34278	-1.5446		Q80UW5	122.79	6.94		Q00898	5.1025	2.3512
Q8BFZ3	0.26098	-1.938		Q80X76	2.2092	1.1435		Q01279	0.46905	-1.0922
Q8BK48	13.158	3.7179		Q80YC5	0.27662	-1.854		Q02105	0.12731	-2.9735
Q8BND5	4.0348	2.0125		Q8BH61	3.0276	1.5982		Q03311	9.9884	3.3202
Q8BPB5	0.17984	-2.4752		Q8BK48	21.878	4.4514		Q03734	4.0826	2.0295
Q8CFG8	0.49933	-1.0019		Q8BND5	4.2854	2.0994		Q05020	7.8856	2.9792
Q8CIZ8	0.38158	-1.3899		Q8BPB5	0.1911	-2.3876		Q06770	16.807	4.071
Q8K0D2	0.38447	-1.379		Q8K0D2	0.34127	-1.551		Q06890	7.1176	2.8314
Q8K1I3	0.41567	-1.2665		Q8K1I3	0.15629	-2.6777		Q08761	2.3972	1.2613
Q8R0Z5	2.9759	1.5733		Q8R0Z5	2.5035	1.324		Q08879	0.14629	-2.7731
Q8R121	8.3626	3.064		Q8R121	7.7416	2.9526		Q3UV17	2.8642	1.5181
Q8VCS0	4.7143	2.237		Q8VCS0	7.4834	2.9037		Q3V209	0.49993	-1.0002
Q91VB4	2.9369	1.5543		Q91WP6	4.7125	2.2365		Q497V5	0.22921	-2.1253
Q91WP0	2.9546	1.5629		Q921I1	0.36278	-1.4628		Q60590	2.3529	1.2344
Q91WP6	5.1033	2.3514		Q9CQW3	0.2557	-1.9675		Q60994	8.0705	3.0127
Q921I1	0.42645	-1.2295		Q9DBB9	0.30212	-1.7268		Q61129	0.40646	-1.2988
Q9CQW3	0.31911	-1.6479		Q9ESB3	0.31663	-1.6591		Q61171	27.275	4.7695
Q9DBB9	0.30438	-1.7161		Q9ET66	0.051385	-4.2825		Q61268	4.9019	2.2933
Q9ESB3	0.3213	-1.638		Q9R098	0.35431	-1.4969		Q61646	2.4181	1.2739
Q9ET66	0.057526	-4.1196		Q9WVJ3	5.8742	2.5544		Q62009	2.7394	1.4539
Q9QWK4	0.48127	-1.0551		Q9Z1T2	0.31141	-1.6831		Q62351	2.6227	1.3911
Q9R098	2.4904	1.3164						Q64726	2.1757	1.1215
Q9WVJ3	14.314	3.8393						Q80UW5	20.071	4.327
Q9Z1R3	0.49186	-1.0237						Q80YC5	0.4302	-1.2169
Q9Z1T2	0.31086	-1.6857						Q8BFZ3	0.47892	-1.0622
								Q8BK48	23.826	4.5745
								Q8BND5	6.2632	2.6469
								Q8BPB5	0.099544	-3.3285
								Q8CFG8	0.49883	-1.0034
								Q8CG16	0.43844	-1.1896
								Q8CIZ8	0.29684	-1.7522
								Q8K0D2	0.40871	-1.2908
								Q8R121	8.7999	3.1375
								Q8VCS0	7.8315	2.9693
								Q8VG05	28.986	4.8573
								Q91WP0	3.0838	1.6247
								Q91WP6	5.2399	2.3895
								Q91X72	2.0671	1.0476
								Q921I1	0.46877	-1.093
								Q923D2	6.4893	2.6981
								Q9CQW3	0.35521	-1.4933
								Q9DBB9	0.30553	-1.7106
								Q9ESB3	0.34788	-1.5233
								Q9QWK4	0.24595	-2.0236
								Q9QXC1	0.38378	-1.3816
								Q9R0R1	0.49993	-1.0002
								Q9WVJ3	33.12	5.0496
								Q9Z126	33.019	5.0452
								Q9Z1R3	0.48614	-1.0405
								Q9Z1T2	0.073077	-3.7744
