# Supplementary material for: Experimental Bothrops atrox Envenomation: Blood Plasma Proteome Effects after Local Tissue Damage and Perspectives on Thromboinflammation
Source: Toxins (Basel). 2022 Sep 1;14(9):613. doi: 10.3390/toxins14090613 (PMC9503785; doi:10.3390/toxins14090613)
Supplement: Supplementary file 1 [file toxins-14-00613-s001.zip › Supplementary Material Table S3.xlsx]

## Sheet: Title
Supplementary Material Table S3: Proteins interaction by enrichment analysis.
Experimental Bothrops atrox envenomation: blood plasma proteome effects after local tissue damage and perspectives on thromboinflammation
Joeliton S. Cavalcante1*, Ingrid Mayara C. de Brito1, Laudicéia Alves de Oliveira1, Luciana Curtolo de Barros2, Cayo Almeida3, Bruno Cesar Rossini4,5, Duaran Lopes Sousa6, Renata Sousa Alves6, Roberta Jeane Bezerra Jorge7,8, Lucilene Delazari dos Santos1,4,9*
1 Graduate Program in Tropical Diseases, Botucatu Medical School (FMB), São Paulo State University (UNESP), Botucatu, SP, Brazil.
2 Center for the Study of Venoms and Venomous Animals (CEVAP), São Paulo State University (UNESP), Botucatu, SP, Brazil.
3 Center of Mathematics, Computing Sciences and Cognition, Federal University of ABC, São Paulo, SP, Brazil.
4 Biotechnology Institute (IBTEC), São Paulo State University (UNESP), Botucatu, SP, Brazil.
5 Department of Chemical and Biological Sciences, São Paulo State University (UNESP), Botucatu, SP, Brazil.
6 Department of Clinical and Toxicological Analysis, Federal University of Ceará, Fortaleza, CE, Brazil.
7 Drug Research and Development Center, Federal University of Ceará (UFC), Fortaleza, CE, Brazil
8 Department of Physiology and Pharmacology, School of Medicine, Federal University of Ceará (UFC), Fortaleza, CE, Brazil.
9 Graduate Program in Research and Development (Medical Biotechnology), Botucatu Medical School (FMB), São Paulo State University (UNESP), Botucatu, SP, Brazil.
*Correspondence: lucilene.delazari@unesp.br (LDS); joeliton.calcavante@unesp.br (JSC)

## Sheet: Data
Reactome
Name	Hits	P-val	P-val(adj.)		Name	Hits	P-val	P-val(adj.)
Class A/1 (Rhodopsin-like receptors)	212	1.49e-139	1.96e-136		Complement and coagulation cascades	60	2.3e-41	3.61e-39
GPCR ligand binding	229	8.4e-121	5.5e-118		Chemokine signaling pathway	86	5.02e-37	5.25e-35
G alpha (i) signalling events	140	1.81e-103	7.9e-101		PI3K-Akt signaling pathway	115	8.05e-35	6.32e-33
G alpha (q) signalling events	134	3.59e-100	1.18e-97		Pathways in cancer	143	2.14e-33	1.35e-31
Gastrin-CREB signalling pathway via PKC and MAPK	142	2.98e-96	7.81e-94		Phospholipase D signaling pathway	66	1.78e-29	9.32e-28
Peptide ligand-binding receptors	141	5.12e-92	1.12e-89		AGE-RAGE signaling pathway in diabetic complications	50	2.52e-25	1.13e-23
Signal Transduction	484	5.57e-89	1.04e-86		RNA polymerase	27	4.32e-25	1.69e-23
Disease	206	3.31e-60	5.42e-58		ErbB signaling pathway	44	1.02e-23	3.56e-22
GPCR downstream signaling	256	7.81e-41	1.14e-38		Taste transduction	45	1.17e-23	3.67e-22
Signaling by GPCR	273	1.65e-39	2.16e-37		Rap1 signaling pathway	70	1.64e-22	4.69e-21
Transcriptional Regulation of White Adipocyte Differentiation	48	8.71e-37	1.04e-34		EGFR tyrosine kinase inhibitor resistance	41	1.05e-21	2.75e-20
Transcriptional Regulation of Adipocyte Differentiation in 3T3-L1 Pre-adipocytes	43	9.17e-36	1e-33		Endocrine resistance	44	2.09e-21	5.04e-20
Platelet activation, signaling and aggregation	92	4.96e-34	5e-32		Calcium signaling pathway	62	1.61e-19	3.62e-18
Degradation of the extracellular matrix	56	3.98e-31	3.72e-29		Estrogen signaling pathway	51	1.95e-19	4.09e-18
Collagen biosynthesis and modifying enzymes	41	1.04e-28	9.06e-27		Regulation of lipolysis in adipocytes	32	4.22e-19	8.28e-18
Growth hormone receptor signaling	39	2.78e-28	2.28e-26		Proteoglycans in cancer	64	5.6e-19	1.03e-17
Regulation of Insulin-like Growth Factor (IGF) Transport and Uptake by Insulin-like Growth Factor Binding Proteins (IGFBPs)	30	3.7e-27	2.85e-25		Focal adhesion	63	6.37e-19	1.11e-17
Extracellular matrix organization	72	2.26e-26	1.64e-24		Platelet activation	48	1.51e-18	2.5e-17
Platelet degranulation	52	4.96e-26	3.42e-24		Gap junction	39	2.69e-18	4.23e-17
Hemostasis	141	6.13e-26	4.02e-24		Collecting duct acid secretion	21	3.98e-17	5.95e-16
Signaling by PDGF	74	1.5e-25	9.33e-24		Jak-STAT signaling pathway	54	4.38e-17	6.24e-16
Degradation of collagen	39	7.04e-25	4.19e-23		Rheumatoid arthritis	37	6.66e-17	9.09e-16
Response to elevated platelet cytosolic Ca2+	52	1.77e-24	1.01e-22		HIF-1 signaling pathway	41	2.54e-16	3.33e-15
Signaling by EGFR in Cancer	72	3.45e-24	1.88e-22		Thyroid hormone signaling pathway	43	3.07e-16	3.86e-15
Amyloids	52	1.29e-23	6.78e-22		ECM-receptor interaction	36	3.24e-16	3.91e-15
Signaling by EGFR	70	4.92e-23	2.48e-21		Purine metabolism	47	4.57e-16	5.32e-15
Prolactin receptor signaling	31	8.55e-23	4.15e-21		Hepatitis C	50	5.46e-15	6.12e-14
Collagen formation	43	6.61e-22	3.09e-20		Cytosolic DNA-sensing pathway	30	7.5e-15	8.12e-14
Nuclear signaling by ERBB4	40	8.05e-22	3.64e-20		Hepatitis B	50	1.25e-14	1.31e-13
Signaling by ERBB4	68	1.51e-21	6.61e-20		Kaposi's sarcoma-associated herpesvirus infection	58	8e-14	8.11e-13
Insulin receptor recycling	26	1.26e-20	5.33e-19		cGMP-PKG signaling pathway	50	1.32e-13	1.29e-12
Transferrin endocytosis and recycling	26	6.95e-20	2.85e-18		Longevity regulating pathway - multiple species	28	1.94e-13	1.85e-12
Interferon alpha/beta signaling	24	1.12e-19	4.44e-18		Longevity regulating pathway	34	2.95e-13	2.71e-12
Regulation of IFNA signaling	23	8.53e-19	3.29e-17		cAMP signaling pathway	56	3.02e-13	2.71e-12
Lipoprotein metabolism	21	6.85e-18	2.56e-16		Prostate cancer	35	6.43e-13	5.61e-12
Formation of Fibrin Clot (Clotting Cascade)	24	6.26e-17	2.28e-15		Natural killer cell mediated cytotoxicity	39	7.85e-13	6.66e-12
Cytokine Signaling in Immune system	81	4.08e-16	1.44e-14		Chagas disease (American trypanosomiasis)	36	9.08e-13	7.5e-12
Iron uptake and transport	29	1.4e-15	4.83e-14		Protein digestion and absorption	33	1.76e-12	1.42e-11
Signaling by Insulin receptor	50	2.28e-15	7.65e-14		Prolactin signaling pathway	29	2.53e-12	1.99e-11
Amine ligand-binding receptors	25	2.84e-15	8.85e-14		Endocrine and other factor-regulated calcium reabsorption	25	3.24e-12	2.48e-11
Phagosomal maturation (early endosomal stage)	25	2.84e-15	8.85e-14		Regulation of actin cytoskeleton	55	3.76e-12	2.81e-11
Latent infection of Homo sapiens with Mycobacterium tuberculosis	25	2.84e-15	8.85e-14		Cholinergic synapse	37	4.22e-12	3.08e-11
Assembly of collagen fibrils and other multimeric structures	28	7.3e-15	2.22e-13		Chronic myeloid leukemia	29	1.26e-11	8.99e-11
EGFR downregulation	23	1.32e-14	3.94e-13		Synaptic vesicle cycle	29	1.84e-11	1.29e-10
Chemokine receptors bind chemokines	31	1.65e-14	4.81e-13		Glioma	28	5.26e-11	3.59e-10
Downstream signal transduction	51	1.66e-13	4.73e-12		Amoebiasis	34	6.03e-11	4.03e-10
Retinoid metabolism and transport	27	3.14e-13	8.75e-12		Non-small cell lung cancer	26	6.32e-11	4.13e-10
Intrinsic Pathway	16	1.05e-12	2.86e-11		Cytokine-cytokine receptor interaction	64	1.15e-10	7.38e-10
Developmental Biology	103	1.07e-12	2.86e-11		Renal cell carcinoma	26	1.39e-10	8.73e-10
Keratan sulfate biosynthesis	19	5.97e-12	1.57e-10		Toll-like receptor signaling pathway	32	1.77e-10	1.09e-09
Signaling by ERBB2	49	6.66e-12	1.71e-10		Glycolysis / Gluconeogenesis	25	5.81e-10	3.51e-09
Signaling by FGFR in disease	51	9.5e-12	2.39e-10		Measles	39	6.96e-10	4.12e-09
P2Y receptors	11	6.76e-11	1.67e-09		Inflammatory mediator regulation of TRP channels	35	3.19e-09	1.85e-08
Signaling by FGFR	47	9.36e-11	2.27e-09		GnRH signaling pathway	28	6.49e-09	3.71e-08
Lipid digestion, mobilization, and transport	22	1.04e-10	2.47e-09		Central carbon metabolism in cancer	23	6.66e-09	3.73e-08
Visual phototransduction	27	2.4e-10	5.56e-09		Apelin signaling pathway	36	1.17e-08	6.43e-08
Downstream signaling of activated FGFR	43	2.42e-10	5.56e-09		Renin secretion	25	1.19e-08	6.43e-08
Signaling by SCF-KIT	42	3.04e-10	6.88e-09		Vascular smooth muscle contraction	36	1.43e-08	7.62e-08
Diseases associated with visual transduction	27	3.78e-10	8.39e-09		Breast cancer	37	1.68e-08	8.78e-08
Keratan sulfate/keratin metabolism	19	3.93e-10	8.58e-09		Melanoma	24	1.74e-08	8.94e-08
Chylomicron-mediated lipid transport	12	5.78e-10	1.22e-08		Melanogenesis	29	2.07e-08	1.05e-07
Nucleotide-like (purinergic) receptors	12	5.78e-10	1.22e-08		Salivary secretion	25	2.15e-08	1.07e-07
HDL-mediated lipid transport	11	7.24e-10	1.5e-08		Endometrial cancer	21	2.61e-08	1.28e-07
GAB1 signalosome	33	1.01e-09	2.06e-08		Acute myeloid leukemia	23	3.45e-08	1.64e-07
SHC1 events in ERBB2 signaling	17	1.07e-09	2.13e-08		FoxO signaling pathway	34	3.46e-08	1.64e-07
NGF signalling via TRKA from the plasma membrane	55	1.07e-09	2.13e-08		Influenza A	39	3.73e-08	1.75e-07
Signaling by constitutively active EGFR	16	1.1e-09	2.15e-08		Renin-angiotensin system	16	4.09e-08	1.89e-07
Removal of aminoterminal propeptides from gamma-carboxylated proteins	9	4.82e-09	9.16e-08		Ras signaling pathway	49	4.82e-08	2.19e-07
Gamma-carboxylation of protein precursors	9	4.82e-09	9.16e-08		Phagosome	41	7.21e-08	3.23e-07
Activation of Matrix Metalloproteinases	22	5.07e-09	9.49e-08		Colorectal cancer	26	7.36e-08	3.25e-07
Gamma-carboxylation, transport, and amino-terminal cleavage of proteins	10	5.61e-09	1.02e-07		Sphingolipid signaling pathway	32	8.34e-08	3.64e-07
Formyl peptide receptors bind formyl peptides and many other ligands	10	5.61e-09	1.02e-07		Progesterone-mediated oocyte maturation	26	1.22e-07	5.23e-07
Complement cascade	21	7.6e-09	1.36e-07		Staphylococcus aureus infection	27	1.28e-07	5.45e-07
DAP12 signaling	47	8.12e-09	1.44e-07		Tuberculosis	40	1.31e-07	5.49e-07
Signal amplification	12	9.17e-09	1.6e-07		Bacterial invasion of epithelial cells	23	1.49e-07	6.18e-07
Signal attenuation	11	1.75e-08	3.01e-07		Pancreatic cancer	23	1.97e-07	8.02e-07
Constitutive PI3K/AKT Signaling in Cancer	29	2.7e-08	4.59e-07		mTOR signaling pathway	36	2.35e-07	9.48e-07
GRB2 events in ERBB2 signaling	14	3.19e-08	5.37e-07		Bladder cancer	16	3.66e-07	1.46e-06
Transport of gamma-carboxylated protein precursors from the endoplasmic reticulum to the Golgi apparatus	8	4.07e-08	6.5e-07		Insulin signaling pathway	33	5.22e-07	2.05e-06
Regulation of Insulin Secretion by Fatty Acids Bound to GPR40 (FFAR1)	8	4.07e-08	6.5e-07		Gastric acid secretion	22	6.59e-07	2.56e-06
Regulation of Insulin Secretion by Free Fatty Acids	8	4.07e-08	6.5e-07		Pyruvate metabolism	15	7.16e-07	2.74e-06
Lysosphingolipid and LPA receptors	8	4.07e-08	6.5e-07		VEGF signaling pathway	19	7.31e-07	2.77e-06
Orexin and neuropeptides FF and QRFP bind to their respective receptors	9	4.31e-08	6.8e-07		Type II diabetes mellitus	17	8.05e-07	3.01e-06
DAP12 interactions	47	5.96e-08	9.3e-07		Circadian entrainment	26	9.48e-07	3.5e-06
Regulation of Complement cascade	12	7.43e-08	1.15e-06		Adipocytokine signaling pathway	21	1.3e-06	4.74e-06
PI-3K cascade	29	9.03e-08	1.31e-06		Carbon metabolism	29	1.48e-06	5.33e-06
PIP3 activates AKT signaling	29	9.03e-08	1.31e-06		Long-term depression	19	1.74e-06	6.22e-06
PI3K events in ERBB4 signaling	29	9.03e-08	1.31e-06		Oxytocin signaling pathway	34	1.77e-06	6.23e-06
PI3K events in ERBB2 signaling	29	9.03e-08	1.31e-06		AMPK signaling pathway	29	4.24e-06	1.48e-05
PI3K/AKT Signaling in Cancer	29	9.03e-08	1.31e-06		Biosynthesis of amino acids	21	6.85e-06	2.36e-05
Platelet Aggregation (Plug Formation)	19	1.19e-07	1.71e-06		Insulin secretion	22	1.02e-05	3.5e-05
RNA Polymerase III Chain Elongation	14	1.38e-07	1.95e-06		Glycosaminoglycan biosynthesis - keratan sulfate	8	1.09e-05	3.68e-05
RNA Polymerase III Transcription Termination	14	1.38e-07	1.95e-06		Glutamatergic synapse	26	1.57e-05	5.25e-05
Innate Immune System	102	2.29e-07	3.19e-06		Pentose phosphate pathway	12	1.75e-05	5.78e-05
PI3K/AKT activation	29	3.59e-07	4.95e-06		Glucagon signaling pathway	24	1.91e-05	6.24e-05
Eicosanoid ligand-binding receptors	10	3.63e-07	4.95e-06		Insulin resistance	25	2.43e-05	7.86e-05
Adenylate cyclase inhibitory pathway	9	7.57e-07	1e-05		Malaria	15	2.7e-05	8.66e-05
Inhibition of adenylate cyclase pathway	9	7.57e-07	1e-05		African trypanosomiasis	13	3.39e-05	0.000108
Anchoring fibril formation	9	7.57e-07	1e-05		Epstein-Barr virus infection	41	4.39e-05	0.000138
Signalling by NGF	65	8.12e-07	1.05e-05		Neurotrophin signaling pathway	26	4.72e-05	0.000147
Glycosaminoglycan metabolism	32	9.09e-07	1.05e-05		Osteoclast differentiation	27	4.79e-05	0.000147
MPS IX - Natowicz syndrome	32	9.09e-07	1.05e-05		Ovarian steroidogenesis	16	4.85e-05	0.000148
Mucopolysaccharidoses	32	9.09e-07	1.05e-05		Fluid shear stress and atherosclerosis	29	5.46e-05	0.000165
MPS IIIB - Sanfilippo syndrome B	32	9.09e-07	1.05e-05		Aldosterone synthesis and secretion	23	5.81e-05	0.000174
MPS VI - Maroteaux-Lamy syndrome	32	9.09e-07	1.05e-05		Small cell lung cancer	21	0.0001	0.000296
MPS IV - Morquio syndrome A	32	9.09e-07	1.05e-05		Thyroid hormone synthesis	18	0.000108	0.000318
MPS IIIC - Sanfilippo syndrome C	32	9.09e-07	1.05e-05		Aldosterone-regulated sodium reabsorption	12	0.000123	0.000358
MPS VII - Sly syndrome	32	9.09e-07	1.05e-05		Fc epsilon RI signaling pathway	17	0.00014	0.000402
MPS II - Hunter syndrome	32	9.09e-07	1.05e-05		T cell receptor signaling pathway	22	0.000144	0.000411
MPS I - Hurler syndrome	32	9.09e-07	1.05e-05		Leukocyte transendothelial migration	24	0.000148	0.000419
MPS IIID - Sanfilippo syndrome D	32	9.09e-07	1.05e-05		Thiamine metabolism	7	0.000212	0.000595
MPS IIIA - Sanfilippo syndrome A	32	9.09e-07	1.05e-05		Pyrimidine metabolism	15	0.000228	0.000633
MPS IV - Morquio syndrome B	32	9.09e-07	1.05e-05		DNA replication	11	0.000247	0.00068
Interleukin-3, 5 and GM-CSF signaling	19	9.52e-07	1.09e-05		Necroptosis	31	0.000503	0.00137
Thrombin signalling through proteinase activated receptors (PARs)	11	9.66e-07	1.1e-05		Pertussis	17	0.000578	0.00156
NCAM1 interactions	16	1.09e-06	1.23e-05		Dilated cardiomyopathy	19	0.000607	0.00163
Integrin cell surface interactions	27	1.26e-06	1.42e-05		MAPK signaling pathway	45	0.000717	0.00191
Regulation of Insulin Secretion by Acetylcholine	8	1.47e-06	1.61e-05		NOD-like receptor signaling pathway	34	0.000836	0.00221
ADP signalling through P2Y purinoceptor 1	8	1.47e-06	1.61e-05		B cell receptor signaling pathway	16	0.000896	0.00233
SHC1 events in ERBB4 signaling	12	1.64e-06	1.76e-05
